# Supplementary material for: Cross vascular risk for first and recurrent hospitalised atherothrombosis determined retrospectively from linked data
Source: PubMed Central journal article supplement — BMJ Open. 2013 Nov 20;3(11):e003813. doi: 10.1136/bmjopen-2013-003813 (PMC3840350; doi:10.1136/bmjopen-2013-003813), 2013-11-20
Supplement: bmjopen-2013-003813.draft_revisions.pdf [file bmjopen-2013-003813.draft_revisions.pdf]

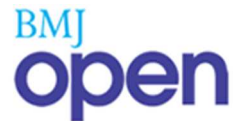

**Cross vascular risk for first and recurrent hospitalised atherothrombosis determined retrospectively from linked data**

|                                 |                                                                                                                                                                                                                                                                                                                                                                                                                                                                                                                                                                                                                                                                                                                                                                                                                                                                                                                                       |
|---------------------------------|---------------------------------------------------------------------------------------------------------------------------------------------------------------------------------------------------------------------------------------------------------------------------------------------------------------------------------------------------------------------------------------------------------------------------------------------------------------------------------------------------------------------------------------------------------------------------------------------------------------------------------------------------------------------------------------------------------------------------------------------------------------------------------------------------------------------------------------------------------------------------------------------------------------------------------------|
| Journal:                        | <i>BMJ Open</i>                                                                                                                                                                                                                                                                                                                                                                                                                                                                                                                                                                                                                                                                                                                                                                                                                                                                                                                       |
| Manuscript ID:                  | bmjopen-2013-003813                                                                                                                                                                                                                                                                                                                                                                                                                                                                                                                                                                                                                                                                                                                                                                                                                                                                                                                   |
| Article Type:                   | Research                                                                                                                                                                                                                                                                                                                                                                                                                                                                                                                                                                                                                                                                                                                                                                                                                                                                                                                              |
| Date Submitted by the Author:   | 14-Aug-2013                                                                                                                                                                                                                                                                                                                                                                                                                                                                                                                                                                                                                                                                                                                                                                                                                                                                                                                           |
| Complete List of Authors:       | Briffa, Thomas; University of Western Australia, School of Population Health<br>Nedkoff, Lee; The University of Western Australia, School of Population health<br>Knuiman, Matthew; The University of Western Australia, School of Population Health<br>Hankey, Graeme; The University of Western Australia, School of Medicine and Pharmacology<br>Norman, Paul; The University of Western Australia, School of Surgery<br>Hung, Joseph; The University of Western Australia, School of Medicine and Pharmacology; Sir Charles Gairdner Hospital Unit, Cardiovascular Medicine<br>Thompson, Peter; Sir Charles Gairdner Hospital Unit, Cardiovascular Medicine<br>Hickling, Siobhan; The University of Western Australia, School of Population Health<br>Bremner, Alexandra; The University of Western Australia, School of Population Health<br>Sanfilippo, Frank; The University of Western Australia, School of Population Health |
| <b>Primary Subject Heading</b>: | Epidemiology                                                                                                                                                                                                                                                                                                                                                                                                                                                                                                                                                                                                                                                                                                                                                                                                                                                                                                                          |
| Secondary Subject Heading:      | Cardiovascular medicine, Health policy                                                                                                                                                                                                                                                                                                                                                                                                                                                                                                                                                                                                                                                                                                                                                                                                                                                                                                |
| Keywords:                       | Cardiac Epidemiology < CARDIOLOGY, VASCULAR MEDICINE, PREVENTIVE MEDICINE                                                                                                                                                                                                                                                                                                                                                                                                                                                                                                                                                                                                                                                                                                                                                                                                                                                             |
|                                 |                                                                                                                                                                                                                                                                                                                                                                                                                                                                                                                                                                                                                                                                                                                                                                                                                                                                                                                                       |

SCHOLARONE™  
Manuscripts

1  
2  
3 **Title:** Cross vascular risk for first and recurrent hospitalised atherothrombosis determined  
4  
5 retrospectively from linked data  
6  
7  
8  
9

10  
11 **Short Title:** Cross vascular disease risk  
12  
13

14  
15  
16  
17 **First Author:** TG Briffa, Research Associate Professor, School of Population Health  
18  
19

20  
21  
22  
23 **Authors:**  
24

25  
26 Tom G Briffa,<sup>\*</sup> Associate Professor and Head, Cardiovascular Research Group  
27

28  
29 Lee J Nedkoff,<sup>\*</sup> Research Associate, PhD Candidate  
30

31  
32 Matthew W Knuiman,<sup>\*</sup> Winthrop Professor, Senior Biostatistician  
33

34  
35 Graeme J Hankey,<sup>§</sup> Clinical Professor, Consultant Neurologist  
36

37  
38 Paul E Norman,<sup>‡</sup> Winthrop Professor, Consultant Vascular Surgeon  
39

40  
41 Joseph Hung,<sup>†</sup> Winthrop Professor, Consultant Cardiologist  
42

43  
44 Peter L Thompson,<sup>f</sup> Clinical Professor, Consultant Cardiologist  
45

46  
47 Siobhan Hickling,<sup>\*</sup> Assistant Professor, Dietetic Epidemiologist  
48

49  
50 Alexandra Bremner,<sup>\*</sup> Associate Professor, Biostatistician  
51

52  
53 Frank M Sanfilippo,<sup>\*</sup> Research Associate Professor, Pharmacoepidemiologist  
54  
55  
56  
57  
58  
59  
60

### Department and Institutional Affiliations

\* School of Population Health, The University of Western Australia, Western Australia.

† School of Medicine and Pharmacology, Sir Charles Gairdner Hospital Unit, The University of Western Australia, Western Australia

‡ School of Surgery, The University of Western Australia, Western Australia

§ School of Medicine and Pharmacology, Royal Perth Hospital Unit, The University of Western Australia, Western Australia

f Sir Charles Gairdner Hospital Unit, Western Australia

### Address for correspondence:

Dr Tom Briffa, School of Population Health, M431

The University of Western Australia, 35 Stirling Highway, Crawley, Western Australia 6009

Tel: 0011 61 8 6488 1291

Fax: 0015 61 8 6488 1188

Email: tom.briffa@uwa.edu.au

**Word Count:** Abstract: 250; Body of text: 2481

**Subject Codes:** [8] Epidemiology [100] Health Policy and Outcome Research

## Structured Abstract

**Objectives** – To determine sex and age-specific risk ratios for first-ever and recurrent hospitalisation for cerebrovascular, coronary and peripheral arterial disease in persons with versus without other vascular history in Western Australia from 2005-2007.

**Design** – Cross-sectional linkage study.

**Setting** – Hospitalised population in a representative Australian State.

**Participants** – All persons aged 34 to 85 years between 1 January 2005 and 31 December 2007 hospitalised with a principal diagnosis of atherothrombosis.

**Data sources** – Person-linked file of statutory collected administrative morbidity and mortality records.

**Main outcome measures** – Sex and age-specific risk ratios for first-ever and recurrent hospitalisations for symptomatic atherothrombosis of the brain, coronary and periphery using a 15-year lead-in to determine prior events.

**Results** – Over 3 years, 40,877 (66% men; 55% first-ever) were hospitalised for atherothrombosis. For each arterial territory, age-specific recurrent rates were higher than the corresponding first-ever rates, with the biggest difference seen in the youngest age groups. For all types of first-ever atherothrombosis, rates were higher in those with other vascular history and risk ratios declined with advancing age (trend: all  $P < 0.0001$ ) and remained significantly  $> 1$  even for 75-84 year-olds. Whereas, for recurrent events, rates were marginally higher in those with other vascular history and no risk ratio-age trend was apparent with several not significantly  $> 1$  (trend: all  $P > 0.13$ ).

**Conclusions** - This study of hospitalised atherothrombosis suggests first-events predominate and that the risk of further events in the same or other arterial territory is very high for all ages and both sexes, accentuating the necessity for early and sustained active prevention.

### Article focus

- Stroke and heart attack dominate the vascular burden
- Vascular disease rates rise steeply with age
- Cross vascular risk is predictive of disease recurrence

### Key messages

- First-ever atherothrombosis leads the vascular burden
- The risk of a new vascular event in same or another territory is universally very high
- Target primary and secondary prevention to reduce the population disease burden

### Strengths and limitations of this study

- Quantification of new and recurrent vascular risk by disease subtype and prior history
- Excluding the very elderly, non-hospitalised events and underdiagnoses of other vascular disease likely overestimated the dominance of coronary events
- Including non-acute hospitalisations will have increased the absolute event rates but had negligible effect on relative comparisons.

## Introduction

Few studies have reported population-based estimates of the rate and determinants of incident and recurrent vascular events of the brain (cerebrovascular disease), coronary (coronary heart disease) and periphery (peripheral arterial disease) collectively. The Oxford Vascular Study[1] indicated that 63% of all atherothrombosis subtypes were incident (first-ever) events, and 37% recurrent. Cerebrovascular events were most common, more than coronary, and all rates rose steeply with age. In contrast, the international REACH Registry[2] of atherothrombotic disease in primary-care suggested that coronary events were most common, and that history of symptomatic atheroma in more than one vascular bed was a strong predictor of higher rates of recurrence in the same and other vascular beds.

We aimed to explore the application of the results from the OXVASC and REACH studies[1,2] in a population-based study of hospitalisations for vascular disease among Western Australians aged 35-84 years between 2005 and 2007. Our specific aims were to determine: (1) the absolute age and sex-specific annual rates of first-ever and recurrent hospitalisations for symptomatic atherothrombosis of the brain, coronary and periphery; (2) the independent, significant contributions of atherothrombosis in a different vascular bed to first-ever and recurrent hospitalisations for symptomatic events of the brain, coronary and periphery.

## Methods

### *Setting and data source*

We conducted a cross-sectional data linkage study of statutory collected administrative data with no direct participant contact. The demographic profile and main health indices for WA are reflective of the Australian population.[3] Linked public and private hospital morbidity

1  
2  
3 and mortality data were extracted retrospectively from the WA Data Linkage System which  
4 is regularly audited for quality.[4] Person-based records are linked with >99% accuracy using  
5 probabilistic matching on standard criteria.[4] A linked file of all hospital admissions and  
6 deaths for all persons experiencing a cardiovascular event from 1 January 1990 to 31  
7 December 2007 was available. As morbidity data in the very elderly are considered less  
8 reliable, event rates are calculated and reported for people aged 35-84 years.  
9  
10  
11  
12  
13  
14  
15  
16  
17  
18  
19  
20  
21  
22  
23  
24  
25  
26  
27  
28  
29  
30  
31  
32  
33  
34  
35  
36  
37  
38  
39  
40  
41  
42  
43  
44  
45  
46  
47  
48  
49  
50  
51  
52  
53  
54  
55  
56  
57  
58  
59  
60

Atherothrombosis diagnoses were identified from discharge records according to the International Classification of Disease (ICD) versions 9-Clinical Modification and 10-Australian Modification.[5] The study was approved by research ethics committees at The University of WA (#RA/4/1/1491) and the Department of Health WA (#2009/18).

#### *Definition and classification of atherothrombosis categories*

Emergency and elective hospital admissions for brain, coronary and periphery ischaemia were identified from principal diagnoses on the discharge records and are described elsewhere.[6] Briefly, coronary included myocardial infarction, unstable angina, stable angina or other ischaemic heart disease; brain included cerebral infarction, transient ischaemic attack, precerebral or cerebral artery disease without infarction, unspecified stroke or intracerebral haemorrhage; and periphery comprised atherosclerosis of the aorta, renal arteries or arteries of the extremities, unspecified peripheral vascular disease, Buerger's disease or stricture of arteries. Hospital morbidity codes for brain[7], coronary[8] and periphery[9] ischaemia have been previously validated, as have vascular deaths.[10] Hospital transfers were counted as one admission, as were readmissions for the same condition within 28 days for coronary, and within one day for each of brain and periphery episodes.

1  
2  
3 All atherothrombosis hospitalisations between 1 January 2005 and 31 December 2007 were  
4 classified by vascular bed (or disease subtype), and as first-ever or recurrent (or event type).  
5  
6 First-ever events were defined as having no hospitalisation in the same vascular bed during a  
7  
8 15-year look-back period, otherwise the event was classified as recurrent. The same 15-year  
9  
10 look back period was used to determine the binary variable of prior hospitalisation for other  
11  
12 vascular manifestations. The 15-year look-back period was also used to identify the  
13  
14 comorbidities of diabetes, hypertension, chronic kidney disease, atrial fibrillation, heart  
15  
16 failure, chronic lung disease and cancer. There were <0.001% missing values for any of the  
17  
18 variables used in this study.  
19  
20  
21  
22  
23  
24  
25  
26

### 27 *Statistical analysis*

28  
29  
30 Males and females were analysed separately. For each disease subtype, selected differences  
31  
32 in patient characteristics (age by event type, and first-ever events by other vascular history)  
33  
34 were evaluated using t-tests and  $\chi^2$  respectively. Overall proportions of first-ever and  
35  
36 recurrent disease patients with hypertension, diabetes, chronic kidney disease, atrial  
37  
38 fibrillation, heart failure, chronic lung disease and cancer were calculated. Age-specific first-  
39  
40 ever and recurrent rates were calculated for each of brain, coronary and periphery stratified  
41  
42 by other vascular history, using the number of events for that disease subtype over the three  
43  
44 years (2005-2007) as the numerator and the corresponding disease-free (prevalent cases  
45  
46 excluded) or disease-specific WA population as the denominator, respectively. Poisson  
47  
48 regression was used to estimate risk ratios for first-ever and recurrent hospitalisations for  
49  
50 each vascular bed for people with other vascular history compared with people without other  
51  
52 vascular history. Models include sex, 5-year age group, and other vascular disease history.  
53  
54  
55 An interaction term of other vascular disease by 10-year age-group was added to the Poisson  
56  
57  
58  
59  
60



1  
2  
3 model to test for trend in the risk ratio across age groups. Whilst technically we have  
4  
5 estimated rate ratios these are interpreted as 1-year risk ratios as these two ratios are  
6  
7 numerically very similar when the rates have small magnitude. Data analyses were performed  
8  
9 using SAS (version 9.3),[11] and statistical significance was set at  $p < 0.05$ .  
10  
11

## 12 13 14 15 **Results**

16  
17  
18 There were 27,156 hospitalisations (53% first-ever) for atherothrombosis in men and 13,721  
19  
20 (59% first-ever) in women aged 35 to 84 years between 2005 and 2007 (Table 1). Seventy-six  
21  
22 percent of brain admissions were first-ever, whereas just over half were first-ever for  
23  
24 coronary and periphery. Coronary patients were younger for both first-ever and recurrent  
25  
26 admissions compared with their brain and periphery counterparts. The percentage of cases in  
27  
28 the 75-84 year age group varied from a low of 17% in men for first-ever coronary event, to a  
29  
30 high of 56% in women for recurrent brain events. Hypertension was the most common  
31  
32 comorbidity followed by diabetes and chronic kidney disease. Periphery patients were less  
33  
34 likely to be admitted acutely and more likely to undergo angiography and/or invasive  
35  
36 intervention than brain or coronary patients.  
37  
38  
39

40  
41  
42  
43  
44 Coronary admissions dominated first-ever (67% in men and 61% in women) and recurrent  
45  
46 hospitalisations (80% in men and 77% in women) for atherothrombosis (Table 1). Only 6%  
47  
48 of first-ever coronary events in men and women had a prior admission for other vascular  
49  
50 disease, compared with first-ever brain (27% men, 18% women) and first-ever periphery  
51  
52 (44% men, 30% women) hospitalisations. Recurrent events were more likely than first-ever  
53  
54 events to have a history of vascular disease in another vascular bed.  
55  
56  
57  
58  
59  
60

### *Atherothrombosis event rates and risk ratios*

Figure 1 shows sex and age-specific first-ever and recurrent hospitalisation rates for each disease subtype by history of other vascular disease. Age-specific rates ranged from about 3/1000 for first-ever brain event with no other vascular history to about 200/1000 for recurrent coronary event with other vascular history. For each vascular bed, age-specific recurrent rates in those with and without other vascular history were higher than the first-ever rates, with the biggest difference seen in the youngest age groups. For first-ever atherothrombosis, rates were generally higher in those with other vascular history compared with no other vascular history, particularly in the youngest age groups. There was little difference between those with and without other vascular history for recurrent rates, a trend seen across all age groups, although there were no recurrent hospitalisations for brain or periphery ischaemia involving another vascular territory in the 35-44 year age group in men.

Table 2 shows sex and age-specific risk ratios for first-ever and recurrent hospitalisation by disease subtype comparing persons with other vascular history to those without. The highest risk ratios were for first-ever brain hospitalisations in women 35-44 years (risk ratios 31.5, 95% CI 13.7 to 72.5) and for first-ever periphery event in men and women 35-44 years (risk ratios 21.7, 95% CI 6.3 to 75.1; risk ratios 19.2, 95% CI 2.5 to 145.9, respectively), although confidence intervals were wide. The risk of a first-ever event was greater for those with versus without other vascular history in all age groups, however risk ratios for all first-ever disease subtypes declined with advancing age (trend: all  $P < 0.0001$ ). Risk ratios for recurrent hospitalisations were smaller than for first-ever hospitalisations and several (including all risk ratios for recurrent periphery event) were not significant. Further, risk ratios for recurrent hospitalisations showed no trend with advancing age (trend: all  $P > 0.05$ ).

## Discussion

This nationally representative population study of 40,877 first-ever and recurrent hospitalised atherothrombosis documents sex and age-specific risk ratios by vascular bed and history of other vascular disease. The majority of hospitalisations are first-ever, led by coronary, then brain and least for periphery; whilst first-ever rates without a history of other vascular disease rose steeply with age. Recurrent hospitalisation rates in men and women for any disease subtype are substantially higher than the corresponding first-ever rates, although narrowed with advancing age. A history of other vascular disease was associated with a high risk of a new event in another vascular bed in younger men and women. In contrast, a history of other vascular disease had little influence on recurrent events of any type and at any age. Greater sex and age-specific risk ratios occurred in first-ever brain and periphery hospitalisations compared with coronary events. There was less variance in risk ratios for recurrent events across disease subtypes. These findings suggest that once atherothrombosis is clinically manifest in any vascular bed, the risk of further events in the same or another vascular location is very high for all ages and both sexes. This reinforces the need for active secondary prevention in all patients with atherothrombotic disease of any type and regardless of age.

### *Strengths and limitations*

Extensive and high-quality person-based linkage of all hospitalised atherothrombosis by other vascular history enabled determination of first-ever and recurrent rates and disease risk ratios.[4] Events were identified from the principal diagnosis at discharge and in-hospital death code where apparent, as previously validated by our group,[7-10] and others.[12] Sex and age-specific findings are largely consistent within and between disease subtypes, although the risk ratio's with wide CIs in 35-44 age groups should be interpreted with caution. Nonfatal brain/coronary attacks treated in the community were not included in the

1  
2  
3 analyses but are expected to be small in number.[6] Recognised underdiagnoses of peripheral  
4 arterial disease and cerebrovascular events may have resulted,[13] thus diluting their relative  
5 contribution to the total hospitalised atherothrombosis burden. Excluding the very elderly has  
6 likely overestimated the dominance of coronary events at the expense of brain events, as  
7 would the associated elective admissions for the diagnostic (e.g. stress testing, coronary  
8 angiography) and coronary revascularisation procedures. The inclusion of non-acute  
9 hospitalisations for greater coverage of elective procedures will have increased the absolute  
10 rates of events but had negligible effect on relative comparisons.  
11  
12  
13  
14  
15  
16  
17  
18  
19  
20  
21  
22  
23

#### 24 *Comparisons with other studies*

25  
26  
27 The age distribution and medical profile of each disease subtype in this representative  
28 Australian study are consistent with other hospitalised population studies for myocardial  
29 infarction [14,], stroke [15] and peripheral arterial disease.[16] We found little difference in  
30 recurrent rates by sex and age, which is entirely consistent with the non-uniform findings of  
31 others.[18, 17-20] Differences in methodology likely account for the variability, including:  
32 sample size, case definition, all hospitalisations, age restrictions, ethnicity, risk factor profile,  
33 duration of follow-up and adjustment for covariates.  
34  
35  
36  
37  
38  
39  
40  
41  
42  
43  
44

45 The comprehensive population OXVASC study [1] confirms that the majority of  
46 atherothrombosis is incident (63% versus 57% in the present study), but led by stroke in that  
47 population, and that rates rise steeply with age. The large multinational REACH Registry  
48 suggests coronary events dominate the atherothrombosis burden and supports incremental  
49 higher rates with other arterial disease involvement.[21] In a separate REACH analysis[13],  
50 patients with peripheral disease experienced lower atherothrombosis rates than patients with  
51  
52  
53  
54  
55  
56  
57  
58  
59  
60

1  
2  
3 stroke or coronary disease, independent of other vascular history. There were no differences  
4  
5 in atherothrombosis rates by gender, possibly due to low enrolment of women in that  
6  
7 study.[22] Two smaller studies, the SIRO trial [23] and MITICO study [24] reported stroke  
8  
9 patients with polyvascular disease had higher rates of recurrence. For co-morbidities, high  
10  
11 proportions of first-ever or recurrent atherothrombosis with hypertension, diabetes and  
12  
13 chronic kidney disease have been variously identified in population and cohort studies.[15,  
14  
15 21, 24-27]  
16  
17  
18  
19

### 20 21 *Implication of results*

22  
23  
24 These sex and age-specific rates and risk ratios for first-ever and recurrent hospitalised  
25  
26 atherothrombosis by vascular bed and history of other vascular disease permit comparisons of  
27  
28 secondary over primary prevention. To minimize the disease burden on the population and  
29  
30 hospitals we should aim to prevent the 56% first-ever hospitalisations, in particular for the  
31  
32 brain where it is 76%. The prevention of recurrent events is also very important (and not a  
33  
34 mutually exclusive) priority, as they contribute a substantial volume of all hospitalisations,  
35  
36 about 44%. The substantially higher risk ratios for recurrent events in persons with and  
37  
38 without a history of other vascular disease magnify the scope for systematic secondary  
39  
40 prevention across disease subtypes.  
41  
42  
43  
44  
45  
46

47  
48 In Australia, increased uptake and adherence to antiplatelet, blood pressure-lowering and  
49  
50 lipid-lowering medication in persons with established atherothrombosis, and long-term anti-  
51  
52 smoking campaigns are priority targets for improving cardiovascular outcomes.[28] Two  
53  
54 Australian general practice studies suggest the application of these proven secondary  
55  
56 prevention measures continues to be suboptimal.[29, 30] These findings are poignant given  
57  
58  
59  
60

1  
2  
3 the high rates of recurrent events and raised risk ratios in men and women across the age span  
4  
5 in the present study. Further, the higher rates of a first-ever admission where there is a history  
6  
7 of vascular disease in a different territory, particularly in the younger age groups, necessitates  
8  
9 more aggressive treatment of risk factors. There was no clear gender difference which may be  
10  
11 because of the similarly high levels of comorbidities in men and women, or because results  
12  
13 were stratified by age, although there may be differences in the over 85 year age group which  
14  
15 we have not investigated. Our findings have potential implications for the management of  
16  
17 approximately 0.25 million (4.3% of the population) women and 0.5 million (8.6%) men in  
18  
19 Australia hospitalised for atherothrombosis.[6]  
20  
21  
22  
23  
24  
25  
26

27 Contributing to the high risk ratios of recurrent atherothrombosis in both sexes is that over  
28  
29 half are hypertensive and around a quarter variously have diabetes, chronic kidney disease,  
30  
31 atrial fibrillation and heart failure, consistent with other studies.[15, 17, 21, 26] Such  
32  
33 comorbidities will likely complicate clinical treatment during rehospitalisation and  
34  
35 subsequent chronic care.  
36  
37  
38  
39  
40  
41

### 42 *Conclusions*

43  
44 We have shown in a population-based study of hospitalised atherothrombosis that first-ever  
45  
46 events predominate and that once vascular disease clinically manifest, the risk of further  
47  
48 events in the same or another vascular bed is very high, even for the young, supressing the  
49  
50 usual demographic effects. These findings highlight the need for greater awareness among  
51  
52 clinicians, patients and funders as to the level of risk related to recurrent events and detail the  
53  
54 cross-risk associated with a prior hospitalisation in other vascular locations. These findings  
55  
56  
57  
58  
59  
60

1  
2  
3 have important implications for prevention strategies, and the prioritising of resources for  
4  
5 service provision and research, and they signal an upward trajectory in absolute numbers of  
6  
7 events as the population ages. Data on hospital incidence, recurrence, and event risk ratios  
8  
9 across the vasculature will also permit modelling the effect of shared secondary preventive  
10  
11 treatments, such as cardioprotective pharmacotherapy and lifestyle changes, on the total  
12  
13 burden of hospitalised atherothrombosis.  
14  
15  
16  
17  
18  
19  
20  
21  
22  
23  
24  
25  
26  
27  
28  
29  
30  
31  
32  
33  
34  
35  
36  
37  
38  
39  
40  
41  
42  
43  
44  
45  
46  
47  
48  
49  
50  
51  
52  
53  
54  
55  
56  
57  
58  
59  
60

## Acknowledgements

We acknowledge the Data Linkage Branch (Health Department of WA) for extraction and provision of the data used for this study.

## Declaration of Conflicting Interests

None Declared

## Funding Acknowledgements

This work was supported by the National Health and Medical Research Council of Australia [#572558] and The University of Western Australia. The funder played no part in the conception, design, conduct, analysis, interpretation and the preparation of this manuscript.

## Contributors

TB, MK, GJH PEN and JH conceived and designed the study; LN, FS, SH, TB prepared the data files for analysis; TB, LN undertook the data analysis and drafted the paper; MK wrote the statistical plan and together with AB provided advanced statistical support; JH, GJH, PEN, PLT, FS provided clinical advice; all authors contributed to interpretation of data, reviewing article drafts, and approving the final manuscript. TB is guarantor.

## Data sharing

The sharing of the linked data file is not permitted under the conditions under which ethics for the study was granted



## References

1. Rothwell PM, Coull AJ, Silver LE, et al; Oxford Vascular Study. Population-based study of event-rate, incidence, case fatality, and mortality for all acute vascular events in all arterial territories. *Lancet*. 2005; 366:1773-1783.
2. Bhatt DL, Steg PG, Ohman M, et al; REACH Registry Investigators. International prevalence, recognition, and treatment of cardiovascular risk factors in outpatients with atherothrombosis. *JAMA*. 2006; 295:180-189.
3. Clark A, Preen DB, Ng JQ, et al. Is Western Australia representative of other Australian States and Territories in terms of key socio-demographic and health economic indicators? *Aust Health Rev*. 2010; 34:210-215.
4. Holman CDJ, Bass AJ, Rouse IL, et al. Population-based linkage of health records in Western Australia: development of a health services research linked database. *Aust N Z J Public Health*. 1999; 23:453-459.
5. World Health Organization. *International Classification of Diseases: the international statistical classification of diseases, injuries, and causes of death*.  
<http://www.who.int/classifications/icd/en/> (20 June 2013)
6. Nedkoff LJ, Briffa TG, Knuiman M, et al. Temporal trends in the incidence and recurrence of hospitalised atherothrombotic disease in an Australian population, 2000 - 2007. *Heart*. 2012;98:1449-1456.
7. Jamrozik K, Dobson A, Hobbs M, et al. Monitoring the incidence of cardiovascular disease in Australia. Report No. CVD Series 17. Canberra: AIHW; 2001.
8. Sanfilippo FM, Hobbs MST, Knuiman MW, et al. Can we monitor heart attack in the troponin era: evidence from a population-based cohort study. *BMC Cardiovasc Disord*. 2011; 11:35.

- 1  
2  
3 9. Mattes E, Norman PE, Jamrozik K. Falling incidence of amputations for peripheral  
4  
5 occlusive arterial disease in Western Australia between 1980 and 1992. *Eur J Vasc*  
6  
7 *Endovasc Surg.* 1997; 13:14-22.
- 8  
9  
10 10. Norman PE, Semmens JB, Lawrence-Brown MMD, et al. Long term relative survival  
11  
12 after surgery for population based study abdominal aortic aneurysm in Western  
13  
14 Australia. *BMJ.* 1998; 317:852-856.
- 15  
16 11. SAS version 9.3 for Windows (Cary, North Carolina, USA).
- 17  
18 12. Goldstein LB. Accuracy of ICD-9-CM coding for the identification of patients with acute  
19  
20 ischemic stroke: effect of modifier codes. *Stroke.* 1998; 29:1602-1604.
- 21  
22 13. Bhatt DL, Peterson ED, Harrington RA, et al. Prior polyvascular disease: risk factor for  
23  
24 adverse ischaemic outcomes in acute coronary syndromes. *Eur Heart J.* 2009; 30:1195-  
25  
26 1202.
- 27  
28 14. Schmidt M, Jacobsen JB, Lash TL, et al. 25 year trends in first time hospitalisation for  
29  
30 acute myocardial infarction, subsequent short and long term mortality, and the prognostic  
31  
32 impact of sex and comorbidity: a Danish nationwide cohort study. *BMJ.* 2012 Jan  
33  
34 25;344:e356.
- 35  
36 15. Rothwell PM, Coull AJ, Silver LE, et al; Oxford Vascular Study. Change in stroke  
37  
38 incidence, mortality, case-fatality, severity, and risk factors in Oxfordshire, UK from  
39  
40 1981 to 2004 (Oxford Vascular Study). *Lancet.* 2004; 363:1925–1933.
- 41  
42 16. Van Kuijk J-P, Flu W-J, Welten GMJM, et al. Long-term prognosis of patients with  
43  
44 peripheral arterial disease with or without polyvascular atherosclerotic disease. *Eur*  
45  
46 *Heart J.* 2010; 31:992–999.
- 47  
48 17. Bairey Merz CN, Shaw LJ, Reis SE, et al; WISE Investigators. Insights from the  
49  
50 NHLBI-Sponsored Women's Ischemia Syndrome Evaluation (WISE) Study: Part II:  
51  
52 gender differences in presentation, diagnosis, and outcome with regard to gender-based  
53  
54  
55  
56  
57  
58  
59  
60

- 1  
2  
3 pathophysiology of atherosclerosis and macrovascular and microvascular coronary  
4 disease. *J Am Coll Cardiol.* 2006;47:S21-29.  
5  
6  
7 18. MacIntyre K, Stewart S, Capewell S, et al. Gender and survival: a population-based study  
8 of 201,114 men and women following a first acute myocardial infarction. *J Am Coll*  
9 *Cardiol.* 2001;38:729-935.  
10  
11  
12 19. D'Ascenzo F, Gonella A, Quadri G, et al. Comparison of mortality rates in women versus  
13 men presenting with ST-segment elevation myocardial infarction. *Am J Cardiol.*  
14 2011;107:651-654.  
15  
16  
17 20. Roger VL, Jacobsen SJ, Weston SA, et al. Trends in the incidence and survival of  
18 patients with hospitalized myocardial infarction, Olmsted County, Minnesota, 1979 to  
19 1994. *Ann Intern Med.* 2002;136:341-348.  
20  
21  
22 21. Steg PG, Bhatt DL, Wilson PW, et al; REACH Registry Investigators. One-year  
23 cardiovascular event rates in outpatients with atherothrombosis. *JAMA.* 2007; 297:1197-  
24 1206.  
25  
26  
27 22. Morrell J, Zeymer U, Baumgartner I, et al; REACH Registry Investigators. Differences  
28 in management and outcomes between male and female patients with atherothrombotic  
29 disease: results from the REACH Registry in Europe. *Eur J Cardiovasc Prev Rehabil.*  
30 2011; 18:270-277.  
31  
32  
33 23. Cimminiello C, Zaninelli A, Carolei A, et al. Atherothrombotic Burden and medium-  
34 term prognosis in patients with acute ischemic stroke: findings of the SIRIO Study.  
35 *Cerebrovasc Dis.* 2012; 33:341-347.  
36  
37  
38 24. Blanco M, Sobrino T, Montaner J, et al; MÍTICO Study. Stroke with polyvascular  
39 atherothrombotic disease. *Atherosclerosis.* 2010; 208: 587-592  
40  
41  
42  
43  
44  
45  
46  
47  
48  
49  
50  
51  
52  
53  
54  
55  
56  
57  
58  
59  
60

- 1  
2  
3 25. Feigin VL, Lawes CMM, Bennett DA, et al. Worldwide stroke incidence and early case  
4 fatality reported in 56 population-based studies: a systematic review. *Lancet Neurol*.  
5 2009; 8:355–369.  
6  
7  
8  
9  
10 26. Yusuf S, Hawken S, Ôunpuu S, et al; INTERHEART investigators. Effect of potentially  
11 modifiable risk factors associated with myocardial infarction in 52 countries: case-  
12 control study. *Lancet*. 2004; 364:937–952.  
13  
14  
15  
16 27. O'Donnell MJ, Xavier D, Liu L, et al; INTERSTROKE investigators. Risk factors for  
17 ischaemic and intracerebral haemorrhagic stroke in 22 countries:a case-control study.  
18 *Lancet*. 2010; 376:112-1 23.  
19  
20  
21  
22  
23 28. Australian Institute of Health and Welfare 2011. *Cardiovascular disease: Australian*  
24 *facts 2011*. Cardiovascular disease series. Cat. no. CVD 53. Canberra: AIHW.  
25  
26  
27 29. Ademi Z, Liew D, Chew D, et al; on behalf of the REACH registry investigators. Drug  
28 Treatment and Cost of Cardiovascular Disease in Australia. *Cardiovascular*  
29 *Therapeutics*. 2009; 27:164–172.  
30  
31  
32  
33  
34 30. Heeley EL, Peiris DP, Patel AA, et al. Cardiovascular risk perception and evidence-  
35 practice gaps in Australian general practice (AusHEART Study). *Med J Aust*.  
36 2010;192:254–259.  
37  
38  
39  
40  
41  
42  
43  
44  
45  
46  
47  
48  
49  
50  
51  
52  
53  
54  
55  
56  
57  
58  
59  
60

1  
2  
3  
4  
5 Figure 1 A-F. Age-specific rates for hospitalised coronary, brain and periphery ischaemia by  
6  
7 other vascular history (OVH; yes/no) in men (A,C,E) and in women (B,D,F),  
8  
9 respectively.  
10  
11  
12  
13  
14  
15  
16  
17  
18  
19  
20  
21  
22  
23  
24  
25  
26  
27  
28  
29  
30  
31  
32  
33  
34  
35  
36  
37  
38  
39  
40  
41  
42  
43  
44  
45  
46  
47  
48  
49  
50  
51  
52  
53  
54  
55  
56  
57  
58  
59  
60

STROBE Statement—Checklist of items that should be included in reports of *cross-sectional studies*

|                              | Item No | Recommendation                                                                                                                                                                                                                                                                                                                                                                                                |                     |
|------------------------------|---------|---------------------------------------------------------------------------------------------------------------------------------------------------------------------------------------------------------------------------------------------------------------------------------------------------------------------------------------------------------------------------------------------------------------|---------------------|
| <b>Title and abstract</b>    | 1       | (a) Indicate the study's design with a commonly used term in the title or the abstract<br>(b) Provide in the abstract an informative and balanced summary of what was done and what was found                                                                                                                                                                                                                 | p 1, 3<br>p 3       |
| <b>Introduction</b>          |         |                                                                                                                                                                                                                                                                                                                                                                                                               |                     |
| Background/rationale         | 2       | Explain the scientific background and rationale for the investigation being reported                                                                                                                                                                                                                                                                                                                          | p 5                 |
| Objectives                   | 3       | State specific objectives, including any prespecified hypotheses                                                                                                                                                                                                                                                                                                                                              | p 5                 |
| <b>Methods</b>               |         |                                                                                                                                                                                                                                                                                                                                                                                                               |                     |
| Study design                 | 4       | Present key elements of study design early in the paper                                                                                                                                                                                                                                                                                                                                                       | p 5.6               |
| Setting                      | 5       | Describe the setting, locations, and relevant dates, including periods of recruitment, exposure, follow-up, and data collection                                                                                                                                                                                                                                                                               | p 5.6               |
| Participants                 | 6       | (a) Give the eligibility criteria, and the sources and methods of selection of participants                                                                                                                                                                                                                                                                                                                   | p 5-7               |
| Variables                    | 7       | Clearly define all outcomes, exposures, predictors, potential confounders, and effect modifiers. Give diagnostic criteria, if applicable                                                                                                                                                                                                                                                                      | p 6.7               |
| Data sources/<br>measurement | 8*      | For each variable of interest, give sources of data and details of methods of assessment (measurement). Describe comparability of assessment methods if there is more than one group                                                                                                                                                                                                                          | p 6.7               |
| Bias                         | 9       | Describe any efforts to address potential sources of bias                                                                                                                                                                                                                                                                                                                                                     | p 6, 10, 1          |
| Study size                   | 10      | Explain how the study size was arrived at                                                                                                                                                                                                                                                                                                                                                                     | n/a                 |
| Quantitative variables       | 11      | Explain how quantitative variables were handled in the analyses. If applicable, describe which groupings were chosen and why                                                                                                                                                                                                                                                                                  | p 7.8               |
| Statistical methods          | 12      | (a) Describe all statistical methods, including those used to control for confounding<br>(b) Describe any methods used to examine subgroups and interactions<br>(c) Explain how missing data were addressed<br>(d) If applicable, describe analytical methods taking account of sampling strategy<br>(e) Describe any sensitivity analyses                                                                    | p 7.8<br>p 7        |
| <b>Results</b>               |         |                                                                                                                                                                                                                                                                                                                                                                                                               |                     |
| Participants                 | 13*     | (a) Report numbers of individuals at each stage of study—eg numbers potentially eligible, examined for eligibility, confirmed eligible, included in the study, completing follow-up, and analysed<br>(b) Give reasons for non-participation at each stage<br>(c) Consider use of a flow diagram                                                                                                               | p 8, Table 1<br>N/A |
| Descriptive data             | 14*     | (a) Give characteristics of study participants (eg demographic, clinical, social) and information on exposures and potential confounders<br>(b) Indicate number of participants with missing data for each variable of interest                                                                                                                                                                               | Table 1             |
| Outcome data                 | 15*     | Report numbers of outcome events or summary measures                                                                                                                                                                                                                                                                                                                                                          | Figure 1            |
| Main results                 | 16      | (a) Give unadjusted estimates and, if applicable, confounder-adjusted estimates and their precision (eg, 95% confidence interval). Make clear which confounders were adjusted for and why they were included<br>(b) Report category boundaries when continuous variables were categorized<br>(c) If relevant, consider translating estimates of relative risk into absolute risk for a meaningful time period | Table 2             |
| Other analyses               | 17      | Report other analyses done—eg analyses of subgroups and interactions, and sensitivity analyses                                                                                                                                                                                                                                                                                                                |                     |

1  
2  
3  
4  
5  
6  
7  
8  
9  
10  
11  
12  
13  
14  
15  
16  
17  
18  
19  
20  
21  
22  
23  
24  
25  
26  
27  
28  
29  
30  
31  
32  
33  
34  
35  
36  
37  
38  
39  
40  
41  
42  
43  
44  
45  
46  
47  
48  
49  
50  
51  
52  
53  
54  
55  
56  
57  
58  
59  
60

| <b>Discussion</b>        |    |                                                                                                                                                                            |
|--------------------------|----|----------------------------------------------------------------------------------------------------------------------------------------------------------------------------|
| Key results              | 18 | Summarise key results with reference to study objectives                                                                                                                   |
| Limitations              | 19 | Discuss limitations of the study, taking into account sources of potential bias or imprecision. Discuss both direction and magnitude of any potential bias                 |
| Interpretation           | 20 | Give a cautious overall interpretation of results considering objectives, limitations, multiplicity of analyses, results from similar studies, and other relevant evidence |
| Generalisability         | 21 | Discuss the generalisability (external validity) of the study results                                                                                                      |
| <b>Other information</b> |    |                                                                                                                                                                            |
| Funding                  | 22 | Give the source of funding and the role of the funders for the present study and, if applicable, for the original study on which the present article is based              |

p 9

p 10,11

p 11,12

p 12

p 15

\*Give information separately for exposed and unexposed groups.

**Note:** An Explanation and Elaboration article discusses each checklist item and gives methodological background and published examples of transparent reporting. The STROBE checklist is best used in conjunction with this article (freely available on the Web sites of PLoS Medicine at <http://www.plosmedicine.org/>, Annals of Internal Medicine at <http://www.annals.org/>, and Epidemiology at <http://www.epidem.com/>). Information on the STROBE Initiative is available at [www.strobe-statement.org](http://www.strobe-statement.org).

**Table 1.** Characteristics of atherothrombosis hospitalisations<sup>†</sup> 2005-2007, Western Australia

| DISEASE SUBTYPE<br><i>cells in %, unless otherwise specified</i> | MEN         |             | WOMEN             |             |
|------------------------------------------------------------------|-------------|-------------|-------------------|-------------|
|                                                                  | First-ever  | Recurrent   | First-ever        | Recurrent   |
| <b>Coronary event, n=29,048 (row %)</b>                          | 9682 (33)   | 10105 (35)  | 4970 (17)         | 4291 (15)   |
| Mean age <sup>□</sup> , (SD) years                               | 62.2 (11.4) | 66.3 (10.8) | 66.0 (11.8)       | 69.7 (10.7) |
| Patients aged 75-84/35-54 years                                  | 17.2/26.0   | 26.9/15.5   | 29.2/18.9         | 40.9/10.7   |
| Prior cerebrovascular disease                                    | 3.4         | 7.9         | 3.8               | 8.3         |
| Prior peripheral arterial disease                                | 1.9         | 4.7         | 1.7               | 4.2         |
| Diabetes                                                         | 20.7        | 33.7        | 23.9              | 39.7        |
| Hypertension                                                     | 50.7        | 78.1        | 59.9              | 85.4        |
| Chronic Kidney Disease                                           | 7.7         | 18.5        | 9.3               | 20.8        |
| Atrial Fibrillation                                              | 11.1        | 22.1        | 12.2              | 21.3        |
| Heart Failure                                                    | 8.9         | 20.7        | 12.3              | 27.1        |
| Chronic Lung Disease                                             | 5.2         | 13.4        | 8.2               | 19.7        |
| Cancer                                                           | 8.2         | 13.9        | 9.9               | 17.5        |
| Acute Admission <sup>†</sup>                                     | 51.2        | 36.9        | 52.1              | 42.7        |
| <b>Brain event, n=7862 (row %)</b>                               | 3556 (45)   | 1149 (15)   | 2465 (31)         | 692 (9)     |
| Mean age <sup>□</sup> , (SD) years                               | 68.3 (11.0) | 71.2 (9.9)  | 70.6 (11.6)       | 72.7 (10.7) |
| Patients aged 75-84/35-54 years                                  | 36.1/12.9   | 47.2/8.0    | 48.7/12.2         | 56.1/7.5    |
| Prior coronary heart disease                                     | 20.6        | 27.0        | 15.0 <sup>f</sup> | 22.4        |
| Prior peripheral arterial disease                                | 2.2         | 5.1         | 2.1               | 2.6         |
| Diabetes                                                         | 26.9        | 33.9        | 26.0              | 33.1        |



|                                                |             |             |                   |             |
|------------------------------------------------|-------------|-------------|-------------------|-------------|
| Hypertension                                   | 65.9        | 81.3        | 66.9              | 81.8        |
| Chronic Kidney Disease                         | 12.1        | 17.8        | 11.5              | 21.5        |
| Atrial Fibrillation                            | 20.3        | 26.0        | 21.3              | 33.5        |
| Heart Failure                                  | 9.8         | 14.5        | 12.0              | 21.0        |
| Chronic Lung Disease                           | 8.3         | 14.5        | 10.2              | 15.3        |
| Cancer                                         | 14.6        | 18.5        | 14.3              | 18.4        |
| Acute Admission†                               | 73.8        | 60.8        | 76.5              | 70.5        |
| <b>Periphery event, n=3967 (row %)</b>         | 1276 (32)   | 1388 (35)   | 680 (17)          | 623 (16)    |
| Mean age <sup>□</sup> , (SD) years             | 69.3 (10.1) | 70.5 (9.6)  | 71.2 (11.0)       | 72.7 (10.0) |
| Patients aged 75-84/35-54 years                | 36.9/8.9    | 40.3/6.4    | 48.5/10.3         | 54.6/7.2    |
| Prior coronary heart disease                   | 27.5        | 30.4        | 18.1 <sup>f</sup> | 24.4        |
| Prior cerebrovascular disease                  | 6.4         | 8.1         | 6.3               | 8.0         |
| Diabetes                                       | 11.5        | 8.6         | 11.5              | 7.5         |
| Hypertension                                   | 47.7        | 56.8        | 52.5              | 64.0        |
| Chronic Kidney Disease                         | 14.4        | 16.7        | 12.8              | 14.3        |
| Atrial Fibrillation                            | 16.3        | 14.7        | 14.7              | 17.5        |
| Heart Failure                                  | 13.2        | 13.0        | 11.0              | 17.2        |
| Chronic Lung Disease                           | 11.4        | 16.4        | 11.3              | 14.4        |
| Cancer                                         | 12.6        | 16.4        | 11.6              | 14.1        |
| Acute Admission†                               | 12.2        | 13.0        | 14.6              | 11.4        |
| <b>All vascular events, n (40,877) (row-%)</b> | 14,514 (35) | 12,642 (31) | 8115 (20)         | 5606 (14)   |

1  
2  
3 † For coronary disease, cerebral infarction or transient ischaemic attack, or atherosclerosis of  
4  
5 the periphery.

6  
7 □ For each disease subtype, mean age varied by sex and event type (incident versus recurrent)  
8  
9 (All  $P < 0.0001$ ).

10  
11  
12 <sup>f</sup> For first-ever brain and periphery events, proportions with prior coronary disease varied by  
13  
14 sex (both  $P < 0.0001$ );

15  
16  
17 SD=standard deviation  
18  
19  
20  
21  
22  
23  
24  
25  
26  
27  
28  
29  
30  
31  
32  
33  
34  
35  
36  
37  
38  
39  
40  
41  
42  
43  
44  
45  
46  
47  
48  
49  
50  
51  
52  
53  
54  
55  
56  
57  
58  
59  
60

**Table 2.** Hospitalised atherothrombotic disease one-year risk ratios by sex and age-group comparing persons with other vascular history to those without: Western Australia 2005-2007

| Age-group years  |                            | Hospitalised disease one-year risk ratio (95% confidence intervals) |                    |                   |                  |                  | Age group        |
|------------------|----------------------------|---------------------------------------------------------------------|--------------------|-------------------|------------------|------------------|------------------|
|                  |                            | 35-44                                                               | 45-54              | 55-64             | 65-74            | 75-84            | trend<br>p value |
| M<br>E<br>N      | Coronary event first-ever  | 2.5 (0.8 to 7.9)                                                    | 3.5 (2.5 to 4.9)   | 2.3 (1.9 to 2.8)  | 1.6 (1.4 to 1.9) | 1.2 (1.1 to 1.4) | <0.0001          |
|                  | recurrent                  | 1.6 (0.8 to 3.3)                                                    | 1.3 (0.9 to 1.7)   | 1.7 (1.5 to 1.9)  | 1.5 (1.4 to 1.7) | 1.5 (1.4 to 1.6) | 0.6283           |
|                  | Brain event first-ever     | 5.4 (2.2 to 13.3)                                                   | 5.0 (3.7 to 6.7)   | 2.2 (1.8 to 2.7)  | 1.6 (1.4 to 1.8) | 1.2 (1.1 to 1.4) | <0.0001          |
|                  | recurrent                  | —*                                                                  | 1.7 (1.0 to 2.9)   | 1.3 (0.9 to 1.9)  | 1.1 (0.9 to 1.3) | 1.2 (1.0 to 1.4) | 0.4721           |
|                  | Periphery event first-ever | 21.7 (6.3 to 75.1)                                                  | 5.1 (3.0 to 8.8)   | 4.9 (3.8 to 6.3)  | 2.8 (2.3 to 3.4) | 1.7 (1.4 to 2.1) | <0.0001          |
|                  | recurrent                  | —*                                                                  | 0.7 (0.4 to 1.3)   | 1.1 (0.8 to 1.4)  | 0.8 (0.7 to 1.0) | 0.9 (0.7 to 1.0) | 0.9696           |
| W<br>O<br>M<br>E | Coronary event first-ever  | 5.6 (1.4 to 22.5)                                                   | 5.3 (3.0 to 9.1)   | 3.0 (2.1 to 4.3)  | 2.2 (1.8 to 2.8) | 1.7 (1.5 to 2.0) | <0.0001          |
|                  | recurrent                  | 1.9 (0.9 to 4.1)                                                    | 1.4 (0.9 to 2.1)   | 2.3 (1.8 to 2.9)  | 1.4 (1.2 to 1.7) | 1.5 (1.3 to 1.7) | 0.1357           |
|                  | Brain event first-ever     | 31.5 (13.7 to 72.5)                                                 | 7.4 (4.4 to 12.3)  | 3.0 (2.1 to 4.4)  | 2.4 (1.9 to 2.9) | 1.7 (1.5 to 1.9) | <0.0001          |
|                  | recurrent                  | 1.9 (0.4 to 8.0)                                                    | 1.0 (0.3 to 3.3)   | 1.3 (0.7 to 2.3)  | 1.4 (1.0 to 2.0) | 1.3 (1.0 to 1.6) | 0.8530           |
|                  | Periphery event first-ever | 19.2 (2.5 to 145.9)                                                 | 11.1 (5.0 to 24.7) | 6.7 (4.1 to 11.1) | 3.7 (2.7 to 5.1) | 2.0 (1.6 to 2.5) | <0.0001          |

|   |           |                   |                  |                  |                  |                  |        |
|---|-----------|-------------------|------------------|------------------|------------------|------------------|--------|
| N | recurrent | 1.7 (0.2 to 13.7) | 1.1 (0.5 to 2.4) | 0.6 (0.4 to 1.2) | 1.1 (0.8 to 1.5) | 0.9 (0.7 to 1.1) | 0.8577 |
|---|-----------|-------------------|------------------|------------------|------------------|------------------|--------|

\*No events in these age-groups.

For peer review only

1  
2  
3  
4  
5  
6  
7  
8  
9  
10  
11  
12  
13  
14  
15  
16  
17  
18  
19  
20  
21  
22  
23  
24  
25  
26  
27  
28  
29  
30  
31  
32  
33  
34  
35  
36  
37  
38  
39  
40  
41  
42  
43  
44  
45  
46  
47  
48  
49

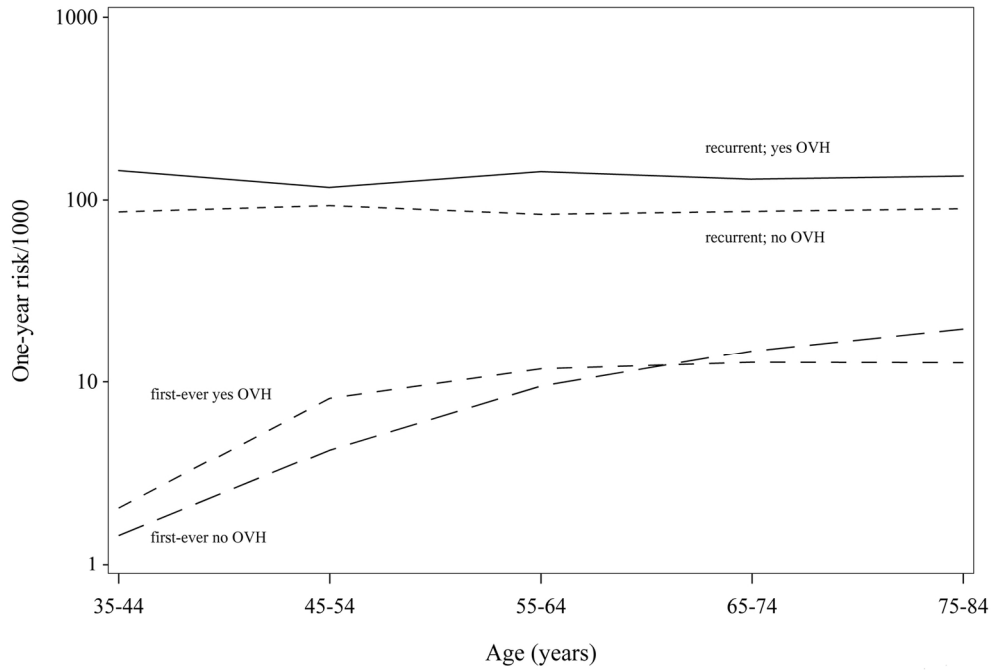

Age-specific rate for hospitalised coronary event by other vascular history (OVH; yes/no) in men  
76x57mm (600 x 600 DPI)

View only

1  
2  
3  
4  
5  
6  
7  
8  
9  
10  
11  
12  
13  
14  
15  
16  
17  
18  
19  
20  
21  
22  
23  
24  
25  
26  
27  
28  
29  
30  
31  
32  
33  
34  
35  
36  
37  
38  
39  
40  
41  
42  
43  
44  
45  
46  
47  
48  
49  
50  
51  
52  
53  
54  
55  
56  
57  
58  
59  
60

1  
2  
3  
4  
5  
6  
7  
8  
9  
10  
11  
12  
13  
14  
15  
16  
17  
18  
19  
20  
21  
22  
23  
24  
25  
26  
27  
28  
29  
30  
31  
32  
33  
34  
35  
36  
37  
38  
39  
40  
41  
42  
43  
44  
45  
46  
47  
48  
49  
50  
51  
52  
53  
54  
55  
56  
57  
58  
59  
60

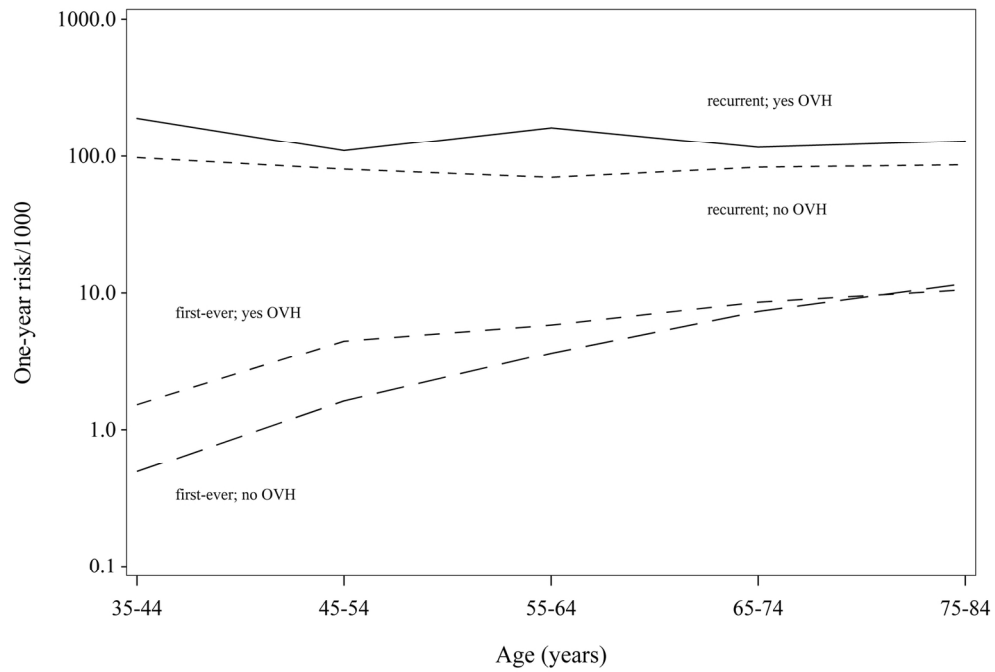

Age-specific rate for hospitalised coronary event by other vascular history (OVH; yes/no) in women  
76x57mm (600 x 600 DPI)

Review only

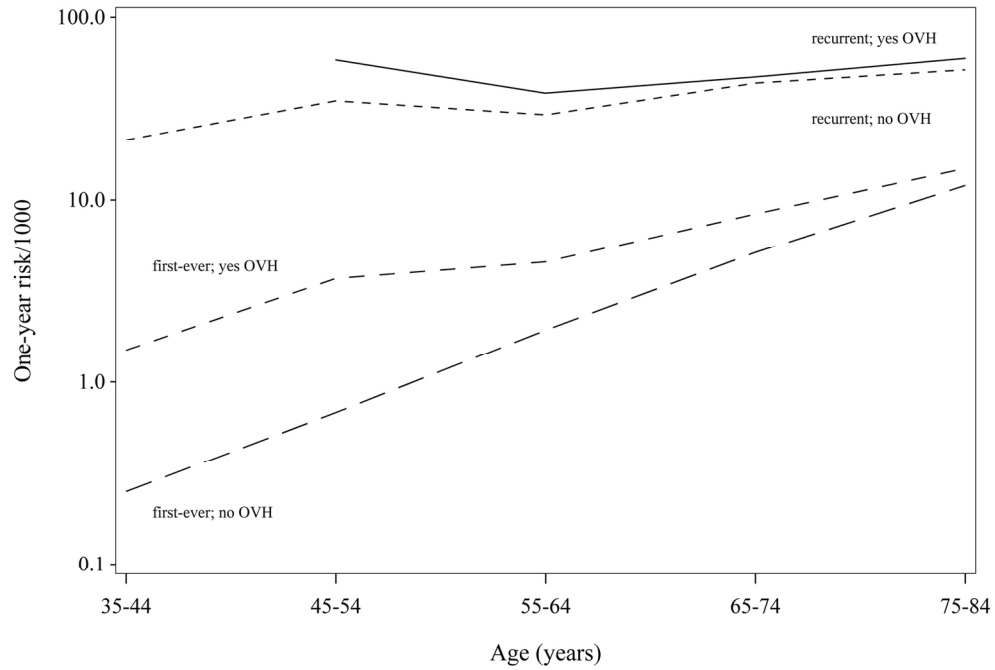

Age-specific rate for hospitalised brain event by other vascular history (OVH; yes/no) in men  
76x57mm (600 x 600 DPI)

Review only

1  
2  
3  
4  
5  
6  
7  
8  
9  
10  
11  
12  
13  
14  
15  
16  
17  
18  
19  
20  
21  
22  
23  
24  
25  
26  
27  
28  
29  
30  
31  
32  
33  
34  
35  
36  
37  
38  
39  
40  
41  
42  
43  
44  
45  
46  
47  
48  
49  
50  
51  
52  
53  
54  
55  
56  
57  
58  
59  
60

1  
2  
3  
4  
5  
6  
7  
8  
9  
10  
11  
12  
13  
14  
15  
16  
17  
18  
19  
20  
21  
22  
23  
24  
25  
26  
27  
28  
29  
30  
31  
32  
33  
34  
35  
36  
37  
38  
39  
40  
41  
42  
43  
44  
45  
46  
47  
48  
49  
50  
51  
52  
53  
54  
55  
56  
57  
58  
59  
60

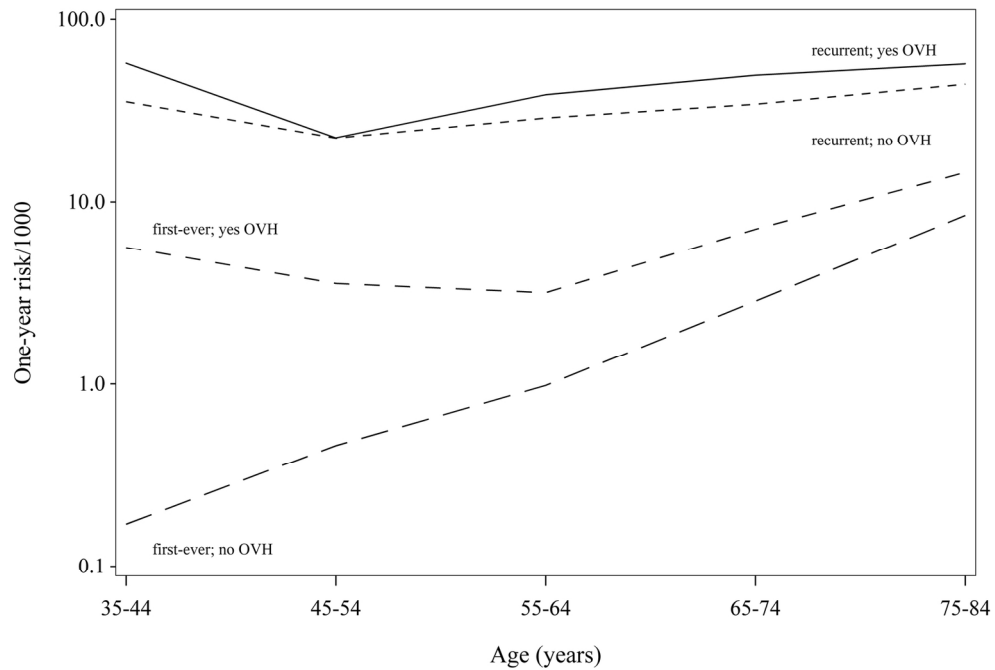

Age-specific rate for hospitalised brain event by other vascular history (OVH; yes/no) in women  
76x57mm (600 x 600 DPI)

ew only



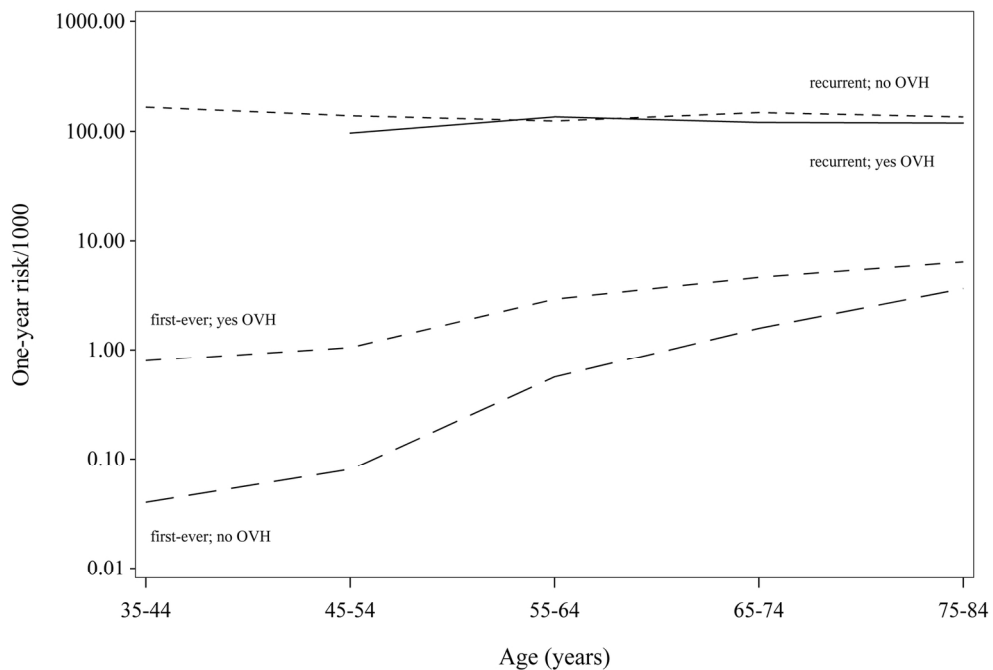

Age-specific rate for hospitalised periphery event by other vascular history (OVH; yes/no) in men  
76x57mm (600 x 600 DPI)

View only

1  
2  
3  
4  
5  
6  
7  
8  
9  
10  
11  
12  
13  
14  
15  
16  
17  
18  
19  
20  
21  
22  
23  
24  
25  
26  
27  
28  
29  
30  
31  
32  
33  
34  
35  
36  
37  
38  
39  
40  
41  
42  
43  
44  
45  
46  
47  
48  
49  
50  
51  
52  
53  
54  
55  
56  
57  
58  
59  
60

1  
2  
3  
4  
5  
6  
7  
8  
9  
10  
11  
12  
13  
14  
15  
16  
17  
18  
19  
20  
21  
22  
23  
24  
25  
26  
27  
28  
29  
30  
31  
32  
33  
34  
35  
36  
37  
38  
39  
40  
41  
42  
43  
44  
45  
46  
47  
48  
49  
50  
51  
52  
53  
54  
55  
56  
57  
58  
59  
60

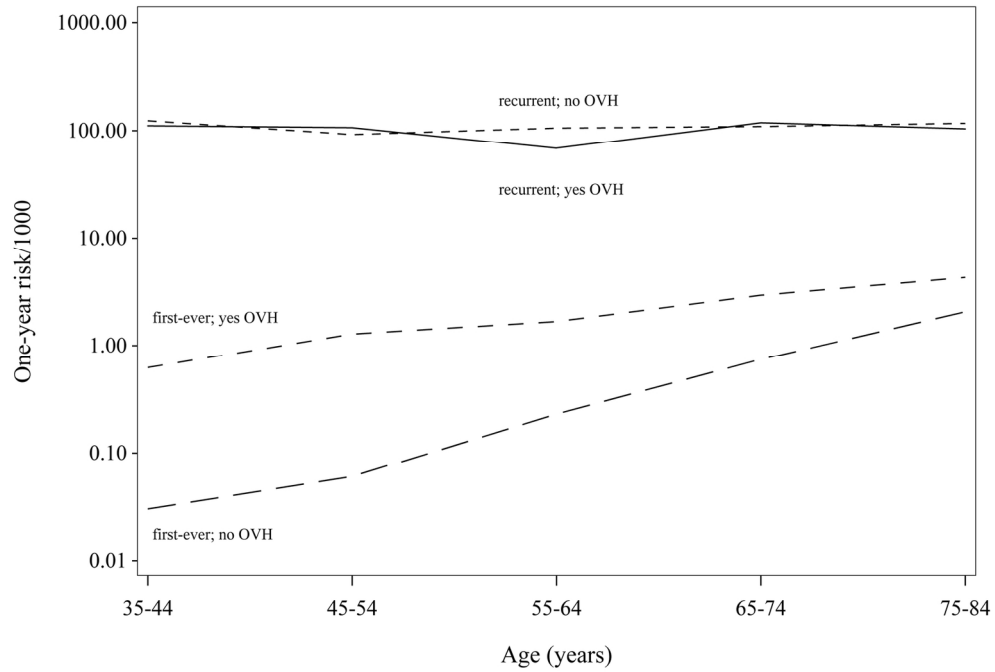

Age-specific rate for hospitalised periphery event by other vascular history (OVH; yes/no) in women  
76x57mm (600 x 600 DPI)

Review only



**Cross vascular risk for first and recurrent hospitalised  
atherothrombosis determined retrospectively from linked  
data**

|                                 |                                                                                                                                                                                                                                                                                                                                                                                                                                                                                                                                                                                                                                                                                                                                                                                                                                                                                                                                       |
|---------------------------------|---------------------------------------------------------------------------------------------------------------------------------------------------------------------------------------------------------------------------------------------------------------------------------------------------------------------------------------------------------------------------------------------------------------------------------------------------------------------------------------------------------------------------------------------------------------------------------------------------------------------------------------------------------------------------------------------------------------------------------------------------------------------------------------------------------------------------------------------------------------------------------------------------------------------------------------|
| Journal:                        | <i>BMJ Open</i>                                                                                                                                                                                                                                                                                                                                                                                                                                                                                                                                                                                                                                                                                                                                                                                                                                                                                                                       |
| Manuscript ID:                  | bmjopen-2013-003813.R1                                                                                                                                                                                                                                                                                                                                                                                                                                                                                                                                                                                                                                                                                                                                                                                                                                                                                                                |
| Article Type:                   | Research                                                                                                                                                                                                                                                                                                                                                                                                                                                                                                                                                                                                                                                                                                                                                                                                                                                                                                                              |
| Date Submitted by the Author:   | 21-Oct-2013                                                                                                                                                                                                                                                                                                                                                                                                                                                                                                                                                                                                                                                                                                                                                                                                                                                                                                                           |
| Complete List of Authors:       | Briffa, Thomas; University of Western Australia, School of Population Health<br>Nedkoff, Lee; The University of Western Australia, School of Population health<br>Knuiman, Matthew; The University of Western Australia, School of Population Health<br>Hankey, Graeme; The University of Western Australia, School of Medicine and Pharmacology<br>Norman, Paul; The University of Western Australia, School of Surgery<br>Hung, Joseph; The University of Western Australia, School of Medicine and Pharmacology; Sir Charles Gairdner Hospital Unit, Cardiovascular Medicine<br>Thompson, Peter; Sir Charles Gairdner Hospital Unit, Cardiovascular Medicine<br>Hickling, Siobhan; The University of Western Australia, School of Population Health<br>Bremner, Alexandra; The University of Western Australia, School of Population Health<br>Sanfilippo, Frank; The University of Western Australia, School of Population Health |
| <b>Primary Subject Heading</b>: | Epidemiology                                                                                                                                                                                                                                                                                                                                                                                                                                                                                                                                                                                                                                                                                                                                                                                                                                                                                                                          |
| Secondary Subject Heading:      | Cardiovascular medicine, Health policy                                                                                                                                                                                                                                                                                                                                                                                                                                                                                                                                                                                                                                                                                                                                                                                                                                                                                                |
| Keywords:                       | Cardiac Epidemiology < CARDIOLOGY, VASCULAR MEDICINE, PREVENTIVE MEDICINE                                                                                                                                                                                                                                                                                                                                                                                                                                                                                                                                                                                                                                                                                                                                                                                                                                                             |
|                                 |                                                                                                                                                                                                                                                                                                                                                                                                                                                                                                                                                                                                                                                                                                                                                                                                                                                                                                                                       |

SCHOLARONE™  
Manuscripts

1  
2 **Title:** Cross vascular risk for first and recurrent hospitalised atherothrombosis determined  
3  
4 retrospectively from linked data  
5  
6  
7  
8  
9

10 **Short Title:** Cross vascular disease risk  
11  
12  
13

14  
15  
16 **First Author:** TG Briffa, Research Associate Professor, School of Population Health  
17  
18  
19

20  
21  
22 **Authors:**  
23

24  
25 Tom G Briffa,<sup>\*</sup> Associate Professor and Head, Cardiovascular Research Group  
26  
27

28 Lee J Nedkoff,<sup>\*</sup> Research Associate, PhD Candidate  
29  
30

31 Matthew W Knuiman,<sup>\*</sup> Winthrop Professor, Senior Biostatistician  
32  
33

34 Graeme J Hankey,<sup>§</sup> Clinical Professor, Consultant Neurologist  
35  
36

37 Paul E Norman,<sup>‡</sup> Winthrop Professor, Consultant Vascular Surgeon  
38  
39

40 Joseph Hung,<sup>†</sup> Winthrop Professor, Consultant Cardiologist  
41  
42

43 Peter L Thompson,<sup>f</sup> Clinical Professor, Consultant Cardiologist  
44  
45

46 Siobhan Hickling,<sup>\*</sup> Assistant Professor, Dietetic Epidemiologist  
47  
48

49 Alexandra Bremner,<sup>\*</sup> Associate Professor, Biostatistician  
50  
51

52 Frank M Sanfilippo,<sup>\*</sup> Research Associate Professor, Pharmacoepidemiologist  
53  
54  
55  
56  
57  
58  
59  
60

## Department and Institutional Affiliations

\* School of Population Health, The University of Western Australia, Western Australia.

† School of Medicine and Pharmacology, Sir Charles Gairdner Hospital Unit, The University of Western Australia, Western Australia

‡ School of Surgery, The University of Western Australia, Western Australia

§ School of Medicine and Pharmacology, Royal Perth Hospital Unit, The University of Western Australia, Western Australia

f Sir Charles Gairdner Hospital Unit, Western Australia

### Address for correspondence:

Dr Tom Briffa, School of Population Health, M431

The University of Western Australia, 35 Stirling Highway, Crawley, Western Australia 6009

Tel: 0011 61 8 6488 1291

Fax: 0015 61 8 6488 1188

Email: tom.briffa@uwa.edu.au

**Word Count:** Abstract: 250; Body of text: 2481

**Subject Codes:** [8] Epidemiology [100] Health Policy and Outcome Research

## Structured Abstract

**Objectives** – To determine sex and age-specific risk ratios for first-ever and recurrent hospitalisation for cerebrovascular, coronary and peripheral arterial disease in persons with versus without other vascular history in Western Australia from 2005-2007.

**Design** – Cross-sectional linkage study.

**Setting** – Hospitalised population in a representative Australian State.

**Participants** – All persons aged 34 to 85 years between 1 January 2005 and 31 December 2007 hospitalised with a principal diagnosis of atherothrombosis.

**Data sources** – Person-linked file of statutory collected administrative morbidity and mortality records.

**Main outcome measures** – Sex and age-specific risk ratios for first-ever and recurrent hospitalisations for symptomatic atherothrombosis of the brain, coronary and periphery using a 15-year lead-in to determine prior events.

**Results** – Over 3 years, 40,877 (66% men; 55% first-ever) were hospitalised for atherothrombosis. For each arterial territory, age-specific recurrent rates were higher than the corresponding first-ever rates, with the biggest difference seen in the youngest age groups. For all types of first-ever atherothrombosis, rates were higher in those with other vascular history and risk ratios declined with advancing age (trend: all  $P < 0.0001$ ) and remained significantly  $> 1$  even for 75-84 year-olds. Whereas, for recurrent events, rates were marginally higher in those with other vascular history and no risk ratio-age trend was apparent with several not significantly  $> 1$  (trend: all  $P > 0.13$ ).

**Conclusions** - This study of hospitalised atherothrombosis suggests first-events predominate and that the risk of further events in the same or other arterial territory is very high for all ages and both sexes, accentuating the necessity for early and sustained active prevention.

## Article focus

- Stroke and heart attack dominate the vascular burden
- Vascular disease rates rise steeply with age
- Cross vascular risk is predictive of disease recurrence

## Key messages

- First-ever atherothrombosis leads the vascular burden
- The risk of a new vascular event in same or another territory is universally very high
- Target primary and secondary prevention to reduce the population disease burden

## Strengths and limitations of this study

- Quantification of new and recurrent vascular risk by disease subtype and prior history
- Excluding the very elderly, non-hospitalised events and underdiagnoses of other vascular disease likely overestimated the dominance of coronary events
- Including non-acute hospitalisations will have increased the absolute event rates but had negligible effect on relative comparisons.

## Introduction

Few studies have reported population-based estimates of the rate and determinants of incident and recurrent vascular events of the brain (cerebrovascular disease), coronary (coronary heart disease) and periphery (peripheral arterial disease) collectively. The Oxford Vascular Study[1] indicated that 63% of all atherothrombosis subtypes were incident (first-ever) events, and 37% recurrent. Cerebrovascular events were most common, more than coronary, and all rates rose steeply with age. In contrast, the international REACH Registry[2] of atherothrombotic disease in primary-care suggested that coronary events were most common, and that history of symptomatic atheroma in more than one vascular bed was a strong predictor of higher rates of recurrence in the same and other vascular beds.

We aimed to explore the application of the results from the OXVASC and REACH studies[1,2] in a population-based study of hospitalisations for vascular disease among Western Australians aged 35-84 years between 2005 and 2007. Our specific aims were to determine: (1) the absolute age and sex-specific annual rates of first-ever and recurrent hospitalisations for symptomatic atherothrombosis of the brain, coronary and periphery; (2) the independent, significant contributions of atherothrombosis in a different vascular bed to first-ever and recurrent hospitalisations for symptomatic events of the brain, coronary and periphery.

## Methods

### *Setting and data source*

We conducted a cross-sectional data linkage study of statutory collected administrative data with no direct participant contact. The demographic profile and main health indices for WA are reflective of the Australian population.[3] Linked public and private hospital morbidity



1  
2 and mortality data were extracted retrospectively from the WA Data Linkage System which  
3 is regularly audited for quality.[4] Person-based records are linked with >99% accuracy using  
4 probabilistic matching on standard criteria.[4] A linked file of all hospital admissions and  
5 deaths for all persons experiencing a cardiovascular event from 1 January 1990 to 31  
6 December 2007 was available. As morbidity data in the very elderly are considered less  
7 reliable, event rates are calculated and reported for people aged 35-84 years.

8  
9  
10  
11  
12  
13  
14  
15  
16  
17  
18  
19  
20  
21  
22  
23  
24  
25  
26  
27  
28  
29  
30  
31  
32  
33  
34  
35  
36  
37  
38  
39  
40  
41  
42  
43  
44  
45  
46  
47  
48  
49  
50  
51  
52  
53  
54  
55  
56  
57  
58  
59  
60  
Atherothrombosis diagnoses were identified from discharge records according to the  
International Classification of Disease (ICD) versions 9-Clinical Modification and 10-  
Australian Modification.[5] The study was approved by research ethics committees at The  
University of WA (#RA/4/1/1491) and the Department of Health WA (#2009/18).

#### *Definition and classification of atherothrombosis categories*

Emergency and elective hospital admissions for brain, coronary and periphery ischaemia  
were identified from principal diagnoses on the discharge records and are described  
elsewhere.[6] Briefly, coronary included myocardial infarction, unstable angina, stable  
angina or other ischaemic heart disease; brain included cerebral infarction, transient  
ischaemic attack, precerebral or cerebral artery disease without infarction, unspecified stroke  
or intracerebral haemorrhage; and periphery comprised atherosclerosis of the aorta, renal  
arteries or arteries of the extremities, unspecified peripheral vascular disease, Buerger's  
disease or stricture of arteries. Hospital morbidity codes for brain[7], coronary[8] and  
periphery[9] ischaemia have been previously validated, as have vascular deaths.[10] Hospital  
transfers were counted as one admission, as were readmissions for the same condition within  
28 days for coronary, and within one day for each of brain and periphery episodes.

1  
2 All atherothrombosis hospitalisations between 1 January 2005 and 31 December 2007 were  
3 classified by vascular bed (or disease subtype), and as first-ever or recurrent (or event type).  
4  
5 First-ever events were defined as having no hospitalisation in the same vascular bed during a  
6  
7 15-year look-back period, otherwise the event was classified as recurrent. The same 15-year  
8  
9 look back period was used to determine the binary variable of prior hospitalisation for other  
10  
11 vascular manifestations. The 15-year look-back period was also used to identify the  
12  
13 comorbidities of diabetes, hypertension, chronic kidney disease, atrial fibrillation, heart  
14  
15 failure, chronic lung disease and cancer. There were <0.001% missing values for any of the  
16  
17 variables used in this study.  
18  
19  
20  
21  
22  
23  
24  
25

### 26 *Statistical analysis*

27  
28  
29 Males and females were analysed separately. For each disease subtype, selected differences  
30  
31 in patient characteristics (age by event type, and first-ever events by other vascular history)  
32  
33 were evaluated using t-tests and  $\chi^2$  respectively. Overall proportions of first-ever and  
34  
35 recurrent disease patients with hypertension, diabetes, chronic kidney disease, atrial  
36  
37 fibrillation, heart failure, chronic lung disease and cancer were calculated. Age-specific first-  
38  
39 ever and recurrent rates were calculated for each of brain, coronary and periphery stratified  
40  
41 by other vascular history, using the number of events for that disease subtype over the three  
42  
43 years (2005-2007) as the numerator and the corresponding disease-free (prevalent cases  
44  
45 excluded) or disease-specific WA population as the denominator, respectively. Poisson  
46  
47 regression was used to estimate risk ratios for first-ever and recurrent hospitalisations for  
48  
49 each vascular bed for people with other vascular history compared with people without other  
50  
51 vascular history. Models include sex, 5-year age group, and other vascular disease history.  
52  
53  
54  
55 An interaction term of other vascular disease by 10-year age-group was added to the Poisson  
56  
57  
58  
59  
60

1  
2 model to test for trend in the risk ratio across age groups. Whilst technically we have  
3  
4 estimated rate ratios these are interpreted as 1-year risk ratios as these two ratios are  
5  
6 numerically very similar when the rates have small magnitude. Data analyses were performed  
7  
8 using SAS (version 9.3),[11] and statistical significance was set at  $p < 0.05$ .  
9  
10

## 11 12 13 **Results**

14  
15  
16  
17 There were 27,156 hospitalisations (53% first-ever) for atherothrombosis in men and 13,721  
18  
19 (59% first-ever) in women aged 35 to 84 years between 2005 and 2007 (Table 1). Seventy-six  
20  
21 percent of brain admissions were first-ever, whereas just over half were first-ever for  
22  
23 coronary and periphery. Coronary patients were younger for both first-ever and recurrent  
24  
25 admissions compared with their brain and periphery counterparts. The percentage of cases in  
26  
27 the 75-84 year age group varied from a low of 17% in men for first-ever coronary event, to a  
28  
29 high of 56% in women for recurrent brain events. Hypertension was the most common  
30  
31 comorbidity followed by diabetes and chronic kidney disease. Periphery patients were less  
32  
33 likely to be admitted acutely and more likely to undergo angiography and/or invasive  
34  
35 intervention than brain or coronary patients.  
36  
37  
38  
39  
40  
41  
42

43  
44 Coronary admissions dominated first-ever (67% in men and 61% in women) and recurrent  
45  
46 hospitalisations (80% in men and 77% in women) for atherothrombosis (Table 1). Only 6%  
47  
48 of first-ever coronary events in men and women had a prior admission for other vascular  
49  
50 disease, compared with first-ever brain (27% men, 18% women) and first-ever periphery  
51  
52 (44% men, 30% women) hospitalisations. Recurrent events were more likely than first-ever  
53  
54 events to have a history of vascular disease in another vascular bed.  
55  
56

57 *Atherothrombosis event rates and risk ratios*  
58  
59  
60

1  
2 Figure 1 shows sex and age-specific first-ever and recurrent hospitalisation rates for each  
3 disease subtype by history of other vascular disease. Age-specific rates ranged from about  
4 3/1000 for first-ever brain event with no other vascular history to about 200/1000 for  
5 recurrent coronary event with other vascular history. For each vascular bed, age-specific  
6 recurrent rates in those with and without other vascular history were higher than the first-ever  
7 rates, with the biggest difference seen in the youngest age groups. For first-ever  
8 atherothrombosis, rates were generally higher in those with other vascular history compared  
9 with no other vascular history, particularly in the youngest age groups. There was little  
10 difference between those with and without other vascular history for recurrent rates, a trend  
11 seen across all age groups, although there were no recurrent hospitalisations for brain or  
12 periphery ischaemia involving another vascular territory in the 35-44 year age group in men.  
13  
14  
15  
16  
17  
18  
19  
20  
21  
22  
23  
24  
25  
26  
27  
28

29 Table 2 shows sex and age-specific risk ratios for first-ever and recurrent hospitalisation by  
30 disease subtype comparing persons with other vascular history to those without. The highest  
31 risk ratios were for first-ever brain hospitalisations in women 35-44 years (risk ratios 31.5,  
32 95% CI 13.7 to 72.5) and for first-ever periphery event in men and women 35-44 years (risk  
33 ratios 21.7, 95% CI 6.3 to 75.1; risk ratios 19.2, 95% CI 2.5 to 145.9, respectively), although  
34 confidence intervals were wide. The risk of a first-ever event was greater for those with  
35 versus without other vascular history in all age groups, however risk ratios for all first-ever  
36 disease subtypes declined with advancing age (trend: all  $P < 0.0001$ ). Risk ratios for recurrent  
37 hospitalisations were smaller than for first-ever hospitalisations and several (including all risk  
38 ratios for recurrent periphery event) were not significant. Further, risk ratios for recurrent  
39 hospitalisations showed no trend with advancing age (trend: all  $P > 0.05$ ).  
40  
41  
42  
43  
44  
45  
46  
47  
48  
49  
50  
51  
52  
53  
54

## 55 Discussion

56  
57  
58  
59  
60

1  
2 This nationally representative population study of 40,877 first-ever and recurrent hospitalised  
3 atherothrombosis documents sex and age-specific risk ratios by vascular bed and history of  
4 other vascular disease. The majority of hospitalisations are first-ever, led by coronary, then  
5 brain and least for periphery; whilst first-ever rates without a history of other vascular disease  
6 rose steeply with age. Recurrent hospitalisation rates in men and women for any disease  
7 subtype are substantially higher than the corresponding first-ever rates, although narrowed  
8 with advancing age. A history of other vascular disease was associated with a high risk of a  
9 new event in another vascular bed in younger men and women. In contrast, a history of other  
10 vascular disease had little influence on recurrent events of any type and at any age. Greater  
11 sex and age-specific risk ratios occurred in first-ever brain and periphery hospitalisations  
12 compared with coronary events. There was less variance in risk ratios for recurrent events  
13 across disease subtypes. These findings suggest that once atherothrombosis is clinically  
14 manifest in any vascular bed, the risk of further events in the same or another vascular  
15 location is very high for all ages and both sexes. This reinforces the need for active secondary  
16 prevention in all patients with atherothrombotic disease of any type and regardless of age.  
17  
18  
19  
20  
21  
22  
23  
24  
25  
26  
27  
28  
29  
30  
31  
32  
33  
34  
35  
36  
37

### 38 *Strengths and limitations*

39  
40 Extensive and high-quality person-based linkage of all hospitalised atherothrombosis by other  
41 vascular history enabled determination of first-ever and recurrent rates and disease risk  
42 ratios.[4] Events were identified from the principal diagnosis at discharge and in-hospital  
43 death code where apparent, as previously validated by our group,[7-10] and others.[12] Sex  
44 and age-specific findings are largely consistent within and between disease subtypes,  
45 although the risk ratio's with wide CIs in 35-44 age groups should be interpreted with  
46 caution. Nonfatal brain/coronary attacks treated in the community were not included in the  
47 analyses but are expected to be small in number.[6] Recognised underdiagnoses of peripheral  
48  
49  
50  
51  
52  
53  
54  
55  
56  
57  
58  
59  
60

1  
2 arterial disease and cerebrovascular events may have resulted,[13] thus diluting their relative  
3 contribution to the total hospitalised atherothrombosis burden. Excluding the very elderly has  
4 likely overestimated the dominance of coronary events at the expense of brain events, as  
5 would the associated elective admissions for the diagnostic (e.g. stress testing, coronary  
6 angiography) and coronary revascularisation procedures. The inclusion of non-acute  
7 hospitalisations for greater coverage of elective procedures will have increased the absolute  
8 rates of events but had negligible effect on relative comparisons.  
9  
10  
11  
12  
13  
14  
15  
16  
17  
18  
19  
20  
21

### 22 *Comparisons with other studies*

23  
24 The age distribution and medical profile of each disease subtype in this representative  
25 Australian study are consistent with other hospitalised population studies for myocardial  
26 infarction [14,], stroke [15] and peripheral arterial disease.[16] We found little difference in  
27 recurrent rates by sex and age, which is entirely consistent with the non-uniform findings of  
28 others.[18, 17-20] Differences in methodology likely account for the variability, including:  
29 sample size, case definition, all hospitalisations, age restrictions, ethnicity, risk factor profile,  
30 duration of follow-up and adjustment for covariates.  
31  
32  
33  
34  
35  
36  
37  
38  
39  
40  
41

42 The comprehensive population OXVASC study [1] confirms that the majority of  
43 atherothrombosis is incident (63% versus 57% in the present study), but led by stroke in that  
44 population, and that rates rise steeply with age. The large multinational REACH Registry  
45 suggests coronary events dominate the atherothrombosis burden and supports incremental  
46 higher rates with other arterial disease involvement.[21] In a separate REACH analysis[13],  
47 patients with peripheral disease experienced lower atherothrombosis rates than patients with  
48 stroke or coronary disease, independent of other vascular history. There were no differences  
49 in atherothrombosis rates by gender, possibly due to low enrolment of women in that  
50  
51  
52  
53  
54  
55  
56  
57  
58  
59  
60

1  
2 study.[22] Two smaller studies, the SIRO trial [23] and MITICO study [24] reported stroke  
3  
4 patients with polyvascular disease had higher rates of recurrence. For co-morbidities, high  
5  
6 proportions of first-ever or recurrent atherothrombosis with hypertension, diabetes and  
7  
8 chronic kidney disease have been variously identified in population and cohort studies.[15,  
9  
10 21, 24-27]  
11  
12

### 13 14 15 *Implication of results* 16

17  
18 These sex and age-specific rates and risk ratios for first-ever and recurrent hospitalised  
19  
20 atherothrombosis by vascular bed and history of other vascular disease permit comparisons of  
21  
22 secondary over primary prevention. To minimize the disease burden on the population and  
23  
24 hospitals we should aim to prevent the 56% first-ever hospitalisations, in particular for the  
25  
26 brain where it is 76%. The prevention of recurrent events is also very important (and not a  
27  
28 mutually exclusive) priority, as they contribute a substantial volume of all hospitalisations,  
29  
30 about 44%. The substantially higher risk ratios for recurrent events in persons with and  
31  
32 without a history of other vascular disease magnify the scope for systematic secondary  
33  
34 prevention across disease subtypes.  
35  
36  
37  
38  
39  
40  
41

42  
43 In Australia, increased uptake and adherence to antiplatelet, blood pressure-lowering and  
44  
45 lipid-lowering medication in persons with established atherothrombosis, and long-term anti-  
46  
47 smoking campaigns are priority targets for improving cardiovascular outcomes.[28] Two  
48  
49 Australian general practice studies suggest the application of these proven secondary  
50  
51 prevention measures continues to be suboptimal.[29, 30] These findings are poignant given  
52  
53 the high rates of recurrent events and raised risk ratios in men and women across the age span  
54  
55 in the present study. Further, the higher rates of a first-ever admission where there is a history  
56  
57 of vascular disease in a different territory, particularly in the younger age groups, necessitates  
58  
59  
60

1  
2 more aggressive treatment of risk factors. There was no clear gender difference which may be  
3  
4 because of the similarly high levels of comorbidities in men and women, or because results  
5  
6 were stratified by age, although there may be differences in the over 85 year age group which  
7  
8 we have not investigated. Our findings have potential implications for the management of  
9  
10 approximately 0.25 million (4.3% of the population) women and 0.5 million (8.6%) men in  
11  
12 Australia hospitalised for atherothrombosis.[6]  
13  
14

15  
16  
17  
18  
19 Contributing to the high risk ratios of recurrent atherothrombosis in both sexes is that over  
20  
21 half are hypertensive and around a quarter variously have diabetes, chronic kidney disease,  
22  
23 atrial fibrillation and heart failure, consistent with other studies.[15, 17, 21, 26] Such  
24  
25 comorbidities will likely complicate clinical treatment during rehospitalisation and  
26  
27 subsequent chronic care.  
28  
29

### 30 31 32 33 34 *Conclusions*

35  
36  
37 We have shown in a population-based study of hospitalised atherothrombosis that first-ever  
38  
39 events predominate and that once vascular disease clinically manifest, the risk of further  
40  
41 events in the same or another vascular bed is very high, even for the young, supressing the  
42  
43 usual demographic effects. These findings highlight the need for greater awareness among  
44  
45 clinicians, patients and funders as to the level of risk related to recurrent events and detail the  
46  
47 cross-risk associated with a prior hospitalisation in other vascular locations. These findings  
48  
49 have important implications for prevention strategies, and the prioritising of resources for  
50  
51 service provision and research, and they signal an upward trajectory in absolute numbers of  
52  
53 events as the population ages. Data on hospital incidence, recurrence, and event risk ratios  
54  
55 across the vasculature will also permit modelling the effect of shared secondary preventive  
56  
57  
58  
59  
60



1  
2 treatments, such as cardioprotective pharmacotherapy and lifestyle changes, on the total  
3  
4 burden of hospitalised atherothrombosis.  
5  
6  
7  
8  
9  
10  
11  
12  
13  
14  
15  
16  
17  
18  
19  
20  
21  
22  
23  
24  
25  
26  
27  
28  
29  
30  
31  
32  
33  
34  
35  
36  
37  
38  
39  
40  
41  
42  
43  
44  
45  
46  
47  
48  
49  
50  
51  
52  
53  
54  
55  
56  
57  
58  
59  
60

## Acknowledgements

We acknowledge the Data Linkage Branch (Health Department of WA) for extraction and provision of the data used for this study.

## Declaration of Conflicting Interests

None Declared

## Funding Acknowledgements

This work was supported by the National Health and Medical Research Council of Australia [#572558] and The University of Western Australia. The funder played no part in the conception, design, conduct, analysis, interpretation and the preparation of this manuscript.

## Contributors

TB, MK, GJH PEN and JH conceived and designed the study; LN, FS, SH, TB prepared the data files for analysis; TB, LN undertook the data analysis and drafted the paper; MK wrote the statistical plan and together with AB provided advanced statistical support; JH, GJH, PEN, PLT, FS provided clinical advice; all authors contributed to interpretation of data, reviewing article drafts, and approving the final manuscript. TB is guarantor.

## Data sharing

The sharing of the linked data file is not permitted under the conditions under which ethics for the study was granted.

**Table 1.** Characteristics of atherothrombosis hospitalisations<sup>†</sup> 2005-2007, Western Australia

| DISEASE SUBTYPE<br><i>cells in %, unless otherwise specified</i> | MEN         |             | WOMEN             |             |
|------------------------------------------------------------------|-------------|-------------|-------------------|-------------|
|                                                                  | First-ever  | Recurrent   | First-ever        | Recurrent   |
| <b>Coronary event, n=29,048 (row %)</b>                          | 9682 (33)   | 10105 (35)  | 4970 (17)         | 4291 (15)   |
| Mean age <sup>□</sup> , (SD) years                               | 62.2 (11.4) | 66.3 (10.8) | 66.0 (11.8)       | 69.7 (10.7) |
| Patients aged 75-84/35-54 years                                  | 17.2/26.0   | 26.9/15.5   | 29.2/18.9         | 40.9/10.7   |
| Prior cerebrovascular disease                                    | 3.4         | 7.9         | 3.8               | 8.3         |
| Prior peripheral arterial disease                                | 1.9         | 4.7         | 1.7               | 4.2         |
| Diabetes                                                         | 20.7        | 33.7        | 23.9              | 39.7        |
| Hypertension                                                     | 50.7        | 78.1        | 59.9              | 85.4        |
| Chronic Kidney Disease                                           | 7.7         | 18.5        | 9.3               | 20.8        |
| Atrial Fibrillation                                              | 11.1        | 22.1        | 12.2              | 21.3        |
| Heart Failure                                                    | 8.9         | 20.7        | 12.3              | 27.1        |
| Chronic Lung Disease                                             | 5.2         | 13.4        | 8.2               | 19.7        |
| Cancer                                                           | 8.2         | 13.9        | 9.9               | 17.5        |
| Acute Admission <sup>†</sup>                                     | 51.2        | 36.9        | 52.1              | 42.7        |
| <b>Brain event, n=7862 (row %)</b>                               | 3556 (45)   | 1149 (15)   | 2465 (31)         | 692 (9)     |
| Mean age <sup>□</sup> , (SD) years                               | 68.3 (11.0) | 71.2 (9.9)  | 70.6 (11.6)       | 72.7 (10.7) |
| Patients aged 75-84/35-54 years                                  | 36.1/12.9   | 47.2/8.0    | 48.7/12.2         | 56.1/7.5    |
| Prior coronary heart disease                                     | 20.6        | 27.0        | 15.0 <sup>f</sup> | 22.4        |
| Prior peripheral arterial disease                                | 2.2         | 5.1         | 2.1               | 2.6         |
| Diabetes                                                         | 26.9        | 33.9        | 26.0              | 33.1        |

|                                                |             |             |                   |             |
|------------------------------------------------|-------------|-------------|-------------------|-------------|
| Hypertension                                   | 65.9        | 81.3        | 66.9              | 81.8        |
| Chronic Kidney Disease                         | 12.1        | 17.8        | 11.5              | 21.5        |
| Atrial Fibrillation                            | 20.3        | 26.0        | 21.3              | 33.5        |
| Heart Failure                                  | 9.8         | 14.5        | 12.0              | 21.0        |
| Chronic Lung Disease                           | 8.3         | 14.5        | 10.2              | 15.3        |
| Cancer                                         | 14.6        | 18.5        | 14.3              | 18.4        |
| Acute Admission†                               | 73.8        | 60.8        | 76.5              | 70.5        |
| <b>Periphery event, n=3967 (row %)</b>         | 1276 (32)   | 1388 (35)   | 680 (17)          | 623 (16)    |
| Mean age <sup>□</sup> , (SD) years             | 69.3 (10.1) | 70.5 (9.6)  | 71.2 (11.0)       | 72.7 (10.0) |
| Patients aged 75-84/35-54 years                | 36.9/8.9    | 40.3/6.4    | 48.5/10.3         | 54.6/7.2    |
| Prior coronary heart disease                   | 27.5        | 30.4        | 18.1 <sup>f</sup> | 24.4        |
| Prior cerebrovascular disease                  | 6.4         | 8.1         | 6.3               | 8.0         |
| Diabetes                                       | 11.5        | 8.6         | 11.5              | 7.5         |
| Hypertension                                   | 47.7        | 56.8        | 52.5              | 64.0        |
| Chronic Kidney Disease                         | 14.4        | 16.7        | 12.8              | 14.3        |
| Atrial Fibrillation                            | 16.3        | 14.7        | 14.7              | 17.5        |
| Heart Failure                                  | 13.2        | 13.0        | 11.0              | 17.2        |
| Chronic Lung Disease                           | 11.4        | 16.4        | 11.3              | 14.4        |
| Cancer                                         | 12.6        | 16.4        | 11.6              | 14.1        |
| Acute Admission†                               | 12.2        | 13.0        | 14.6              | 11.4        |
| <b>All vascular events, n (40,877) (row-%)</b> | 14,514 (35) | 12,642 (31) | 8115 (20)         | 5606 (14)   |

1  
2 † For coronary disease, cerebral infarction or transient ischaemic attack, or atherosclerosis of  
3  
4 the periphery.  
5

6 □ For each disease subtype, mean age varied by sex and event type (incident versus recurrent)  
7  
8  
9 (All  $P < 0.0001$ ).  
10

11 <sup>f</sup> For first-ever brain and periphery events, proportions with prior coronary disease varied by  
12  
13 sex (both  $P < 0.0001$ );  
14

15 SD=standard deviation  
16  
17  
18  
19  
20  
21  
22  
23  
24  
25  
26  
27  
28  
29  
30  
31  
32  
33  
34  
35  
36  
37  
38  
39  
40  
41  
42  
43  
44  
45  
46  
47  
48  
49  
50  
51  
52  
53  
54  
55  
56  
57  
58  
59  
60

**Table 2.** Hospitalised atherothrombotic disease one-year risk ratios by sex and age-group comparing persons with other vascular history to those without: Western Australia 2005-2007

| Age-group years |                            | Hospitalised disease one-year risk ratio (95% confidence intervals) |                    |                   |                  |                  | Age group        |
|-----------------|----------------------------|---------------------------------------------------------------------|--------------------|-------------------|------------------|------------------|------------------|
|                 |                            | 35-44                                                               | 45-54              | 55-64             | 65-74            | 75-84            | trend<br>p value |
| M               | Coronary event first-ever  | 2.5 (0.8 to 7.9)                                                    | 3.5 (2.5 to 4.9)   | 2.3 (1.9 to 2.8)  | 1.6 (1.4 to 1.9) | 1.2 (1.1 to 1.4) | <0.0001          |
|                 | recurrent                  | 1.6 (0.8 to 3.3)                                                    | 1.3 (0.9 to 1.7)   | 1.7 (1.5 to 1.9)  | 1.5 (1.4 to 1.7) | 1.5 (1.4 to 1.6) | 0.6283           |
| E               | Brain event first-ever     | 5.4 (2.2 to 13.3)                                                   | 5.0 (3.7 to 6.7)   | 2.2 (1.8 to 2.7)  | 1.6 (1.4 to 1.8) | 1.2 (1.1 to 1.4) | <0.0001          |
|                 | recurrent                  | —*                                                                  | 1.7 (1.0 to 2.9)   | 1.3 (0.9 to 1.9)  | 1.1 (0.9 to 1.3) | 1.2 (1.0 to 1.4) | 0.4721           |
| N               | Periphery event first-ever | 21.7 (6.3 to 75.1)                                                  | 5.1 (3.0 to 8.8)   | 4.9 (3.8 to 6.3)  | 2.8 (2.3 to 3.4) | 1.7 (1.4 to 2.1) | <0.0001          |
|                 | recurrent                  | —*                                                                  | 0.7 (0.4 to 1.3)   | 1.1 (0.8 to 1.4)  | 0.8 (0.7 to 1.0) | 0.9 (0.7 to 1.0) | 0.9696           |
| W               | Coronary event first-ever  | 5.6 (1.4 to 22.5)                                                   | 5.3 (3.0 to 9.1)   | 3.0 (2.1 to 4.3)  | 2.2 (1.8 to 2.8) | 1.7 (1.5 to 2.0) | <0.0001          |
|                 | recurrent                  | 1.9 (0.9 to 4.1)                                                    | 1.4 (0.9 to 2.1)   | 2.3 (1.8 to 2.9)  | 1.4 (1.2 to 1.7) | 1.5 (1.3 to 1.7) | 0.1357           |
| O               | Brain event first-ever     | 31.5 (13.7 to 72.5)                                                 | 7.4 (4.4 to 12.3)  | 3.0 (2.1 to 4.4)  | 2.4 (1.9 to 2.9) | 1.7 (1.5 to 1.9) | <0.0001          |
|                 | recurrent                  | 1.9 (0.4 to 8.0)                                                    | 1.0 (0.3 to 3.3)   | 1.3 (0.7 to 2.3)  | 1.4 (1.0 to 2.0) | 1.3 (1.0 to 1.6) | 0.8530           |
| M               | Periphery event first-ever | 19.2 (2.5 to 145.9)                                                 | 11.1 (5.0 to 24.7) | 6.7 (4.1 to 11.1) | 3.7 (2.7 to 5.1) | 2.0 (1.6 to 2.5) | <0.0001          |
|                 | recurrent                  | —*                                                                  | —                  | —                 | —                | —                | —                |

|   |           |                   |                  |                  |                  |                  |        |
|---|-----------|-------------------|------------------|------------------|------------------|------------------|--------|
| N | recurrent | 1.7 (0.2 to 13.7) | 1.1 (0.5 to 2.4) | 0.6 (0.4 to 1.2) | 1.1 (0.8 to 1.5) | 0.9 (0.7 to 1.1) | 0.8577 |
|---|-----------|-------------------|------------------|------------------|------------------|------------------|--------|

\*No events in these age-groups.

For peer review only

## References

1. Rothwell PM, Coull AJ, Silver LE, et al; Oxford Vascular Study. Population-based study of event-rate, incidence, case fatality, and mortality for all acute vascular events in all arterial territories. *Lancet*. 2005; 366:1773-1783.
2. Bhatt DL, Steg PG, Ohman M, et al; REACH Registry Investigators. International prevalence, recognition, and treatment of cardiovascular risk factors in outpatients with atherothrombosis. *JAMA*. 2006; 295:180-189.
3. Clark A, Preen DB, Ng JQ, et al. Is Western Australia representative of other Australian States and Territories in terms of key socio-demographic and health economic indicators? *Aust Health Rev*. 2010; 34:210-215.
4. Holman CDJ, Bass AJ, Rouse IL, et al. Population-based linkage of health records in Western Australia: development of a health services research linked database. *Aust N Z J Public Health*. 1999; 23:453-459.
5. World Health Organization. *International Classification of Diseases: the international statistical classification of diseases, injuries, and causes of death*. <http://www.who.int/classifications/icd/en/> (20 June 2013)
6. Nedkoff LJ, Briffa TG, Knuiman M, et al. Temporal trends in the incidence and recurrence of hospitalised atherothrombotic disease in an Australian population, 2000 - 2007. *Heart*. 2012;98:1449-1456.
7. Jamrozik K, Dobson A, Hobbs M, et al. Monitoring the incidence of cardiovascular disease in Australia. Report No. CVD Series 17. Canberra: AIHW; 2001.
8. Sanfilippo FM, Hobbs MST, Knuiman MW, et al. Can we monitor heart attack in the troponin era: evidence from a population-based cohort study. *BMC Cardiovasc Disord*. 2011; 11:35.



- 1  
2  
3  
4  
5  
6  
7  
8  
9  
10  
11  
12  
13  
14  
15  
16  
17  
18  
19  
20  
21  
22  
23  
24  
25  
26  
27  
28  
29  
30  
31  
32  
33  
34  
35  
36  
37  
38  
39  
40  
41  
42  
43  
44  
45  
46  
47  
48  
49  
50  
51  
52  
53  
54  
55  
56  
57  
58  
59  
60
9. Mattes E, Norman PE, Jamrozik K. Falling incidence of amputations for peripheral occlusive arterial disease in Western Australia between 1980 and 1992. *Eur J Vasc Endovasc Surg.* 1997; 13:14-22.
10. Norman PE, Semmens JB, Lawrence-Brown MMD, et al. Long term relative survival after surgery for population based study abdominal aortic aneurysm in Western Australia. *BMJ.* 1998; 317:852-856.
11. SAS version 9.3 for Windows (Cary, North Carolina, USA).
12. Goldstein LB. Accuracy of ICD-9-CM coding for the identification of patients with acute ischemic stroke: effect of modifier codes. *Stroke.* 1998; 29:1602-1604.
13. Bhatt DL, Peterson ED, Harrington RA, et al. Prior polyvascular disease: risk factor for adverse ischaemic outcomes in acute coronary syndromes. *Eur Heart J.* 2009; 30:1195-1202.
14. Schmidt M, Jacobsen JB, Lash TL, et al. 25 year trends in first time hospitalisation for acute myocardial infarction, subsequent short and long term mortality, and the prognostic impact of sex and comorbidity: a Danish nationwide cohort study. *BMJ.* 2012 Jan 25;344:e356.
15. Rothwell PM, Coull AJ, Silver LE, et al; Oxford Vascular Study. Change in stroke incidence, mortality, case-fatality, severity, and risk factors in Oxfordshire, UK from 1981 to 2004 (Oxford Vascular Study). *Lancet.* 2004; 363:1925–1933.
16. Van Kuijk J-P, Flu W-J, Welten GMJM, et al. Long-term prognosis of patients with peripheral arterial disease with or without polyvascular atherosclerotic disease. *Eur Heart J.* 2010; 31:992–999.
17. Bairey Merz CN, Shaw LJ, Reis SE, et al; WISE Investigators. Insights from the NHLBI-Sponsored Women's Ischemia Syndrome Evaluation (WISE) Study: Part II: gender differences in presentation, diagnosis, and outcome with regard to gender-based

- 1  
2 pathophysiology of atherosclerosis and macrovascular and microvascular coronary  
3  
4 disease. *J Am Coll Cardiol.* 2006;47:S21-29.  
5  
6  
7 18. MacIntyre K, Stewart S, Capewell S, et al. Gender and survival: a population-based study  
8  
9 of 201,114 men and women following a first acute myocardial infarction. *J Am Coll*  
10  
11 *Cardiol.* 2001;38:729-935.  
12  
13 19. D'Ascenzo F, Gonella A, Quadri G, et al. Comparison of mortality rates in women versus  
14  
15 men presenting with ST-segment elevation myocardial infarction. *Am J Cardiol.*  
16  
17 2011;107:651-654.  
18  
19  
20 20. Roger VL, Jacobsen SJ, Weston SA, et al. Trends in the incidence and survival of  
21  
22 patients with hospitalized myocardial infarction, Olmsted County, Minnesota, 1979 to  
23  
24 1994. *Ann Intern Med.* 2002;136:341-348.  
25  
26  
27 21. Steg PG, Bhatt DL, Wilson PW, et al; REACH Registry Investigators. One-year  
28  
29 cardiovascular event rates in outpatients with atherothrombosis. *JAMA.* 2007; 297:1197-  
30  
31 1206.  
32  
33 22. Morrell J, Zeymer U, Baumgartner I, et al; REACH Registry Investigators. Differences  
34  
35 in management and outcomes between male and female patients with atherothrombotic  
36  
37 disease: results from the REACH Registry in Europe. *Eur J Cardiovasc Prev Rehabil.*  
38  
39 2011; 18:270-277.  
40  
41  
42 23. Cimminiello C, Zaninelli A, Carolei A, et al. Atherothrombotic Burden and medium-  
43  
44 term prognosis in patients with acute ischemic stroke: findings of the SIRIO Study.  
45  
46 *Cerebrovasc Dis.* 2012; 33:341-347.  
47  
48  
49 24. Blanco M, Sobrino T, Montaner J, et al; MÍTICO Study. Stroke with polyvascular  
50  
51 atherothrombotic disease. *Atherosclerosis.* 2010; 208: 587-592  
52  
53  
54 25. Feigin VL, Lawes CMM, Bennett DA, et al. Worldwide stroke incidence and early case  
55  
56 fatality reported in 56 population-based studies: a systematic review. *Lancet Neurol.*  
57  
58 2009; 8:355-369.  
59  
60

- 1  
2  
3  
4  
5  
6  
7  
8  
9  
10  
11  
12  
13  
14  
15  
16  
17  
18  
19  
20  
21  
22  
23  
24  
25  
26  
27  
28  
29  
30  
31  
32  
33  
34  
35  
36  
37  
38  
39  
40  
41  
42  
43  
44  
45  
46  
47  
48  
49  
50  
51  
52  
53  
54  
55  
56  
57  
58  
59  
60
26. Yusuf S, Hawken S, Ôunpuu S, et al; INTERHEART investigators. Effect of potentially modifiable risk factors associated with myocardial infarction in 52 countries: case-control study. *Lancet*. 2004; 364:937–952.
27. O’Donnell MJ, Xavier D, Liu L, et al; INTERSTROKE investigators. Risk factors for ischaemic and intracerebral haemorrhagic stroke in 22 countries:a case-control study. *Lancet*. 2010; 376:112-1 23.
28. Australian Institute of Health and Welfare 2011. *Cardiovascular disease: Australian facts 2011*. Cardiovascular disease series. Cat. no. CVD 53. Canberra: AIHW.
29. Ademi Z, Liew D, Chew D, et al; on behalf of the REACH registry investigators. Drug Treatment and Cost of Cardiovascular Disease in Australia. *Cardiovascular Therapeutics*. 2009; 27:164–172.
30. Heeley EL, Peiris DP, Patel AA, et al. Cardiovascular risk perception and evidence–practice gaps in Australian general practice (AusHEART Study). *Med J Aust*. 2010;192:254–259.

1  
2  
3  
4 Figure 1 A-F. Age-specific rates for hospitalised coronary, brain and periphery ischaemia by  
5  
6 other vascular history (OVH; yes/no) in men (A,C,E) and in women (B,D,F),  
7  
8 respectively.  
9  
10  
11  
12  
13  
14  
15  
16  
17  
18  
19  
20  
21  
22  
23  
24  
25  
26  
27  
28  
29  
30  
31  
32  
33  
34  
35  
36  
37  
38  
39  
40  
41  
42  
43  
44  
45  
46  
47  
48  
49  
50  
51  
52  
53  
54  
55  
56  
57  
58  
59  
60

For peer review only

**Title:** Cross vascular risk for first and recurrent hospitalised atherothrombosis determined retrospectively from linked data

**Short Title:** Cross vascular disease risk

**First Author:** TG Briffa, Research Associate Professor, School of Population Health

**Authors:**

Tom G Briffa,<sup>\*</sup> Associate Professor and Head, Cardiovascular Research Group

Lee J Nedkoff,<sup>\*</sup> Research Associate, PhD Candidate

Matthew W Knuiman,<sup>\*</sup> Winthrop Professor, Senior Biostatistician

Graeme J Hankey,<sup>§</sup> Clinical Professor of Neurology, Consultant Neurologist

Paul E Norman,<sup>‡</sup> Winthrop Professor, Consultant Vascular Surgeon

Joseph Hung,<sup>†</sup> Winthrop Professor, Consultant Cardiologist

Peter L Thompson,<sup>f</sup> Clinical Professor, Consultant Cardiologist

Siobhan Hickling,<sup>\*</sup> Assistant Professor, Dietetic Epidemiologist

Alexandra Bremner,<sup>\*</sup> Associate Professor, Biostatistician

Frank M Sanfilippo,<sup>\*</sup> Research Associate Professor, Pharmacoepidemiologist

**Department and Institutional Affiliations**

\* School of Population Health, The University of Western Australia, Western Australia.

§ School of Medicine and Pharmacology, ~~Royal Perth Hospital Unit, The~~ University of Western Australia, ~~Perth Western~~ Australia. ~~Department of Neurology, Sir Charles Gairdner Hospital, Perth, Australia~~

Formatted: Font: Times New Roman, 12 pt

‡ School of Surgery, The University of Western Australia, Western Australia

† School of Medicine and Pharmacology, Sir Charles Gairdner Hospital Unit, The University of Western Australia, Western Australia

f Sir Charles Gairdner Hospital Unit, Western Australia

**Address for correspondence:**

Dr Tom Briffa, School of Population Health, M431

The University of Western Australia, 35 Stirling Highway, Crawley, Western Australia 6009

Tel: 0011 61 8 6488 1291

Fax: 0015 61 8 6488 1188

Email: tom.briffa@uwa.edu.au

**Word Count:** Abstract: 250; Body of text: 2481

**Subject Codes:** [8] Epidemiology [100] Health Policy and Outcome Research

## Structured Abstract

**Objectives** – To determine sex and age-specific risk ratios for first-ever and recurrent hospitalisation for cerebrovascular, coronary and peripheral arterial disease in persons with versus without other vascular history in Western Australia from 2005-2007.

**Design** – Cross-sectional linkage study.

**Setting** – Hospitalised population in a representative Australian State.

**Participants** – All persons aged 34 to 85 years between 1 January 2005 and 31 December 2007 hospitalised with a principal diagnosis of atherothrombosis.

**Data sources** – Person-linked file of statutory collected administrative morbidity and mortality records.

**Main outcome measures** – Sex and age-specific risk ratios for first-ever and recurrent hospitalisations for symptomatic atherothrombosis of the brain, coronary and periphery using a 15-year lead-in to determine prior events.

**Results** – Over 3 years, 40,877 (66% men; 55% first-ever) were hospitalised for atherothrombosis. For each arterial territory, age-specific recurrent rates were higher than the corresponding first-ever rates, with the biggest difference seen in the youngest age groups. For all types of first-ever atherothrombosis, rates were higher in those with other vascular history and risk ratios declined with advancing age (trend: all  $P < 0.0001$ ) and remained significantly  $>1$  even for 75-84 year-olds. Whereas, for recurrent events, rates were marginally higher in those with other vascular history and no risk ratio-age trend was apparent with several not significantly  $>1$  (trend: all  $P > 0.13$ ).

**Conclusions** - This population study of hospitalised atherothrombosis suggests that rates of recurrence are substantially higher than first-events independent of vascular territory, age and sex. These findings accentuate the necessity for early and sustained active prevention.

**Article focus**

- Stroke and heart attack dominate the vascular burden
- Vascular disease rates rise steeply with age
- Cross vascular risk is predictive of disease recurrence

**Key messages**

- First-ever atherothrombosis leads the vascular burden
- The risk of a new vascular event in same or another territory is universally very high
- Target primary and secondary prevention to reduce the population disease burden

**Strengths and limitations of this study**

- Quantification of new and recurrent vascular risk by disease subtype and prior history
- Excluding the very elderly, non-hospitalised events and underdiagnoses of other vascular disease likely overestimated the dominance of coronary events
- Including non-acute hospitalisations will have increased the absolute event rates but had negligible effect on relative comparisons.



## Introduction

Few studies have reported population-based estimates of the rate and determinants of incident and recurrent vascular events of the brain (cerebrovascular disease), coronary (coronary heart disease) and periphery (peripheral arterial disease) collectively. The Oxford Vascular Study[1] indicated that 63% of all atherothrombosis subtypes were incident (first-ever) events, and 37% recurrent. Cerebrovascular events were most common, more than coronary, and all rates rose steeply with age. In contrast, the international REACH Registry[2] of atherothrombotic disease in primary-care suggested that coronary events were most common, and that history of symptomatic atheroma in more than one vascular bed was a strong predictor of higher rates of recurrence in the same and other vascular beds.

We aimed to explore the application of the results from the OXVASC and REACH studies[1,2] in a population-based study of hospitalisations for vascular disease among Western Australians aged 35-84 years between 2005 and 2007. Our specific aims were to determine: (1) the absolute age and sex-specific annual rates of first-ever and recurrent hospitalisations for symptomatic atherothrombosis of the brain, coronary and periphery; (2) the independent, significant contributions of atherothrombosis in a different vascular bed to first-ever and recurrent hospitalisations for symptomatic events of the brain, coronary and periphery.

## Methods

### *Setting and data source*

We conducted a cross-sectional data linkage study of statutory collected administrative data with no direct participant contact. The demographic profile and main health indices for WA are reflective of the Australian population.[3] Linked public and private hospital morbidity

1  
2  
3  
4  
5  
6  
7 and mortality data were extracted retrospectively from the WA Data Linkage System which  
8 is regularly audited for quality.[4] Person-based records are linked with >99% accuracy using  
9 probabilistic matching on standard criteria.[4] A linked file of all hospital admissions and  
10 deaths for all persons experiencing a cardiovascular event from 1 January 1990 to 31  
11 December 2007 was available. As morbidity data in the very elderly are considered less  
12 reliable, event rates are calculated and reported for people aged 35-84 years.  
13  
14 Atherothrombosis diagnoses were identified from discharge records according to the  
15 International Classification of Disease (ICD) versions 9-Clinical Modification and 10-  
16 Australian Modification.[5] The study was approved by research ethics committees at The  
17 University of WA (#RA/4/1/1491) and the Department of Health WA (#2009/18).  
18  
19  
20  
21  
22  
23  
24  
25  
26  
27  
28

### 29 *Definition and classification of atherothrombosis categories*

30  
31  
32 Emergency and elective hospital admissions for brain, coronary and periphery ischaemia  
33 were identified from principal diagnoses on the discharge records and are described  
34 elsewhere.[6] Briefly, coronary included myocardial infarction, unstable angina, stable  
35 angina or other ischaemic heart disease; brain included cerebral infarction, transient  
36 ischaemic attack, precerebral or cerebral artery disease without infarction, unspecified stroke  
37 or intracerebral haemorrhage; and periphery comprised atherosclerosis of the aorta, renal  
38 arteries or arteries of the extremities, unspecified peripheral vascular disease, Buerger's  
39 disease or stricture of arteries. Hospital morbidity codes for brain[7], coronary[8] and  
40 periphery[9] ischaemia have been previously validated, as have vascular deaths.[10] Hospital  
41 transfers were counted as one admission, as were readmissions for the same condition within  
42 28 days for coronary, and within one day for each of brain and periphery episodes.  
43  
44  
45  
46  
47  
48  
49  
50  
51  
52  
53  
54  
55  
56  
57  
58  
59  
60

1  
2  
3  
4  
5  
6  
7 All atherothrombosis hospitalisations between 1 January 2005 and 31 December 2007 were  
8 classified by vascular bed (or disease subtype), and as first-ever or recurrent (or event type).  
9  
10 First-ever events were defined as having no hospitalisation in the same vascular bed during a  
11 15-year look-back period, otherwise the event was classified as recurrent. The same 15-year  
12  
13 15-year look back period was used to determine the binary variable of prior hospitalisation for other  
14  
15 vascular manifestations. The 15-year look-back period was also used to identify the  
16  
17 comorbidities of diabetes, hypertension, chronic kidney disease, atrial fibrillation, heart  
18  
19 failure, chronic lung disease and cancer. There were <0.001% missing values for any of the  
20  
21 variables used in this study.  
22  
23  
24  
25  
26

### 27 *Statistical analysis*

28  
29  
30 Males and females were analysed separately. For each disease subtype, selected differences  
31  
32 in patient characteristics (age by event type, and first-ever events by other vascular history)  
33  
34 were evaluated using t-tests and  $\chi^2$  respectively. Overall proportions of first-ever and  
35  
36 recurrent disease patients with hypertension, diabetes, chronic kidney disease, atrial  
37  
38 fibrillation, heart failure, chronic lung disease and cancer were calculated. Age-specific first-  
39  
40 ever and recurrent rates were calculated for each of brain, coronary and periphery stratified  
41  
42 by other vascular history, using the number of events for that disease subtype over the three  
43  
44 years (2005-2007) as the numerator and the corresponding disease-free (prevalent cases  
45  
46 excluded) or disease-specific WA population as the denominator, respectively. Poisson  
47  
48 regression was used to estimate risk ratios for first-ever and recurrent hospitalisations for  
49  
50 each vascular bed for people with other vascular history compared with people without other  
51  
52 vascular history. Models include sex, 5-year age group, and other vascular disease history.  
53  
54 An interaction term of other vascular disease by 10-year age-group was added to the Poisson  
55  
56  
57  
58  
59  
60

1  
2  
3  
4  
5  
6  
7 model to test for trend in the risk ratio across age groups. Whilst technically we have  
8 estimated rate ratios these are interpreted as 1-year risk ratios as these two ratios are  
9 numerically very similar when the rates have small magnitude. Data analyses were performed  
10 using SAS (version 9.3),[11] and statistical significance was set at  $p < 0.05$ .  
11  
12  
13

## 14 15 16 17 **Results**

18  
19 There were 27,156 hospitalisations (53% first-ever) for atherothrombosis in men and 13,721  
20 (59% first-ever) in women aged 35 to 84 years between 2005 and 2007 (Table 1). Seventy-six  
21 percent of brain admissions were first-ever, whereas just over half were first-ever for  
22 coronary and periphery. Coronary patients were younger for both first-ever and recurrent  
23 admissions compared with their brain and periphery counterparts. The percentage of cases in  
24 the 75-84 year age group varied from a low of 17% in men for first-ever coronary event, to a  
25 high of 56% in women for recurrent brain events. Hypertension was the most common  
26 comorbidity followed by diabetes and chronic kidney disease. Periphery patients were less  
27 likely to be admitted acutely and more likely to undergo angiography and/or invasive  
28 intervention than brain or coronary patients.  
29  
30  
31  
32  
33  
34  
35  
36  
37  
38  
39

40  
41  
42 Coronary admissions dominated first-ever (67% in men and 61% in women) and recurrent  
43 hospitalisations (80% in men and 77% in women) for atherothrombosis (Table 1). Only 6%  
44 of first-ever coronary events in men and women had a prior admission for other vascular  
45 disease, compared with first-ever brain (27% men, 18% women) and first-ever periphery  
46 (44% men, 30% women) hospitalisations. Recurrent events were more likely than first-ever  
47 events to have a history of vascular disease in another vascular bed.  
48  
49  
50  
51  
52  
53  
54  
55  
56  
57  
58  
59  
60

### *Atherothrombosis event rates and risk ratios*

Figure 1 shows sex and age-specific first-ever and recurrent hospitalisation rates for each disease subtype by history of other vascular disease. Age-specific rates ranged from about 3/1000 for first-ever brain event with no other vascular history to about 200/1000 for recurrent coronary event with other vascular history. For each vascular bed, age-specific recurrent rates in those with and without other vascular history were higher than the first-ever rates, with the biggest difference seen in the youngest age groups. For first-ever atherothrombosis, rates were generally higher in those with other vascular history compared with no other vascular history, particularly in the youngest age groups. There was little difference between those with and without other vascular history for recurrent rates, a trend seen across all age groups, although there were no recurrent hospitalisations for brain or periphery ischaemia involving another vascular territory in the 35-44 year age group in men.

Table 2 shows sex and age-specific risk ratios for first-ever and recurrent hospitalisation by disease subtype comparing persons with other vascular history to those without. The highest risk ratios were for first-ever brain hospitalisations in women 35-44 years (risk ratios 31.5, 95% CI 13.7 to 72.5) and for first-ever periphery event in men and women 35-44 years (risk ratios 21.7, 95% CI 6.3 to 75.1; risk ratios 19.2, 95% CI 2.5 to 145.9, respectively), although confidence intervals were wide. The risk of a first-ever event was greater for those with versus without other vascular history in all age groups, however risk ratios for all first-ever disease subtypes declined with advancing age (trend: all  $P < 0.0001$ ). Risk ratios for recurrent hospitalisations were smaller than for first-ever hospitalisations and several (including all risk ratios for recurrent periphery event) were not significant. Further, risk ratios for recurrent hospitalisations showed no trend with advancing age (trend: all  $P > 0.05$ ).

## Discussion

This nationally representative population study of 40,877 first-ever and recurrent hospitalised atherothrombosis documents sex and age-specific risk ratios by vascular bed and history of other vascular disease. The majority of hospitalisations are first-ever, led by coronary, then brain and least for periphery; whilst first-ever rates without a history of other vascular disease rose steeply with age. Recurrent hospitalisation rates in men and women for any disease subtype are substantially higher than the corresponding first-ever rates, although narrowed with advancing age. A history of other vascular disease was associated with a high risk of a new event in another vascular bed in younger men and women. In contrast, a history of other vascular disease had little influence on recurrent events of any type and at any age. Greater sex and age-specific risk ratios occurred in first-ever brain and periphery hospitalisations compared with coronary events. There was less variance in risk ratios for recurrent events across disease subtypes. These findings suggest that once atherothrombosis is clinically manifest in any vascular bed, the risk of further events in the same or another vascular location is very high for all ages and both sexes. This reinforces the need for active secondary prevention in all patients with atherothrombotic disease of any type and regardless of age.

### *Strengths and limitations*

Extensive and high-quality person-based linkage of all hospitalised atherothrombosis by other vascular history enabled determination of first-ever and recurrent rates and disease risk ratios.[4] Events were identified from the principal diagnosis at discharge and in-hospital death code where apparent, as previously validated by our group,[7-10] and others.[12] weakness is that the analysis is limited to hospitalisation data and does not control for out-of-hospital deaths. Sex and age-specific findings are largely consistent within and between disease subtypes, although the risk ratio's with wide CIs in 35-44 age groups should be

Formatted: Font: Times New Roman, 12 pt

1  
2  
3  
4  
5  
6  
7 interpreted with caution. Nonfatal brain/coronary attacks treated in the community were not  
8 included in the analyses but are expected to be small in number.[6] Recognised  
9 underdiagnoses of peripheral arterial disease and cerebrovascular events may have  
10 resulted,[13] thus diluting their relative contribution to the total hospitalised atherothrombosis  
11 burden. Excluding the very elderly has likely overestimated the dominance of coronary  
12 events at the expense of brain events, as would the associated elective admissions for the  
13 diagnostic (e.g. stress testing, coronary angiography) and coronary revascularisation  
14 procedures. The inclusion of non-acute hospitalisations for greater coverage of elective  
15 procedures will have increased the absolute rates of events but had negligible effect on  
16 relative comparisons.  
17  
18  
19  
20  
21  
22  
23  
24  
25  
26  
27  
28

### 29 *Comparisons with other studies*

30  
31  
32 The age distribution and medical profile of each disease subtype in this representative  
33 Australian study are consistent with other hospitalised population studies for myocardial  
34 infarction [14,], stroke [15] and peripheral arterial disease.[16] We found little difference in  
35 recurrent rates by sex and age, which is entirely consistent with the non-uniform findings of  
36 others.[18, 17-20] Differences in methodology likely account for the variability, including:  
37 sample size, case definition, all hospitalisations, age restrictions, ethnicity, risk factor profile,  
38 duration of follow-up and adjustment for covariates.  
39  
40  
41  
42  
43  
44  
45  
46

47 The comprehensive population OXVASC study [1] confirms that the majority of  
48 atherothrombosis is incident (63% versus 57% in the present study), but led by stroke in that  
49 population, and that rates rise steeply with age. The large multinational REACH Registry  
50 suggests coronary events dominate the atherothrombosis burden and supports incremental  
51  
52  
53  
54  
55  
56  
57  
58  
59  
60

1  
2  
3  
4  
5  
6  
7 higher rates with other arterial disease involvement.[21] In a separate REACH analysis[13],  
8 patients with peripheral disease experienced lower atherothrombosis rates than patients with  
9 stroke or coronary disease, independent of other vascular history. There were no differences  
10 in atherothrombosis rates by gender, possibly due to low enrolment of women in that  
11 study.[22] Two smaller studies, the SIRO trial [23] and MITICO study [24] reported stroke  
12 patients with polyvascular disease had higher rates of recurrence. For co-morbidities, high  
13 proportions of first-ever or recurrent atherothrombosis with hypertension, diabetes and  
14 chronic kidney disease have been variously identified in population and cohort studies.[15,  
15 21, 24-27]  
16  
17  
18  
19  
20  
21  
22  
23

#### 24 25 26 *Implication of results*

27  
28 These sex and age-specific rates and risk ratios for first-ever and recurrent hospitalised  
29 atherothrombosis by vascular bed and history of other vascular disease permit comparisons of  
30 secondary over primary prevention. To minimize the disease burden on the population and  
31 hospitals we should aim to prevent the 56% first-ever hospitalisations, in particular for the  
32 brain where it is 76%. The prevention of recurrent events is also very important (and not a  
33 mutually exclusive) priority, as they contribute a substantial volume of all hospitalisations,  
34 about 44%. The substantially higher risk ratios for recurrent events in persons with and  
35 without a history of other vascular disease magnify the scope for systematic secondary  
36 prevention across disease subtypes.  
37  
38  
39  
40  
41  
42  
43  
44  
45  
46  
47  
48

49 In Australia, increased uptake and adherence to antiplatelet, blood pressure-lowering and  
50 lipid-lowering medication in persons with established atherothrombosis, and long-term anti-  
51 smoking campaigns are priority targets for improving cardiovascular outcomes.[28] Two  
52  
53  
54  
55  
56  
57  
58  
59  
60



1  
2  
3  
4  
5  
6  
7 Australian general practice studies suggest the application of these proven secondary  
8 prevention measures continues to be suboptimal.[29, 30] These findings are poignant given  
9 the high rates of recurrent events and raised risk ratios in men and women across the age span  
10 in the present study. Further, the higher rates of a first-ever admission where there is a history  
11 of vascular disease in a different territory, particularly in the younger age groups, necessitates  
12 more aggressive treatment of risk factors. [The nationally funded health checks in general  
13 practice for 45-49 year olds are an ideal opportunity to effect comprehensive risk assessment  
14 and more active primary and secondary prevention in this group.](#) There was no clear gender  
15 difference which may be because of the similarly high levels of comorbidities in men and  
16 women, or because results were stratified by age, although there may be differences in the  
17 over 85 year age group which we have not investigated. [Further,](#) ~~Our~~ findings have potential  
18 implications for the management of approximately 0.25 million (4.3% of the population)  
19 women and 0.5 million (8.6%) men in Australia hospitalised for atherothrombosis.[6]  
20  
21  
22  
23  
24  
25  
26  
27  
28  
29  
30  
31  
32  
33  
34

35 Contributing to the high risk ratios of recurrent atherothrombosis in both sexes is that over  
36 half are hypertensive and around a quarter variously have diabetes, chronic kidney disease,  
37 atrial fibrillation and heart failure, consistent with other studies.[15, 17, 21, 26] Such  
38 comorbidities will likely complicate clinical treatment during rehospitalisation and  
39 subsequent chronic care.  
40  
41  
42  
43  
44  
45  
46  
47

#### 48 *Conclusions*

49  
50 We have shown in a population-based study of hospitalised atherothrombosis that first-ever  
51 events predominate and that once vascular disease clinically manifests, the risk of further  
52  
53  
54  
55  
56  
57  
58  
59  
60

1  
2  
3  
4  
5  
6  
7 events in the same or another vascular bed is very high, even for the young, suppressing the  
8 usual demographic effects. These findings highlight the need for greater awareness among  
9 clinicians, patients and funders as to the level of risk related to recurrent events and detail the  
10 cross-risk associated with a prior hospitalisation in other vascular locations. These findings  
11 have important implications for prevention strategies, and the prioritising of resources for  
12 service provision and research, and they signal an upward trajectory in absolute numbers of  
13 events as the population ages. Data on hospital incidence, recurrence, and event risk ratios  
14 across the vasculature will also permit modelling the effect of shared secondary preventive  
15 treatments, such as cardioprotective pharmacotherapy and lifestyle changes, on the total  
16 burden of hospitalised atherothrombosis.  
17  
18  
19  
20  
21  
22  
23  
24  
25  
26  
27  
28  
29  
30  
31  
32  
33  
34  
35  
36  
37  
38  
39  
40  
41  
42  
43  
44  
45  
46  
47  
48  
49  
50  
51  
52  
53  
54  
55  
56  
57  
58  
59  
60

### **Acknowledgements**

We acknowledge the Data Linkage Branch (Health Department of WA) for extraction and provision of the data used for this study.

### **Declaration of Conflicting Interests**

None Declared

### **Funding Acknowledgements**

This work was supported by the National Health and Medical Research Council of Australia [#572558] and The University of Western Australia. The funder played no part in the conception, design, conduct, analysis, interpretation and the preparation of this manuscript.

### **Contributors**

TB, MK, GJH PEN and JH conceived and designed the study; LN, FS, SH, TB prepared the data files for analysis; TB, LN undertook the data analysis and drafted the paper; MK wrote the statistical plan and together with AB provided advanced statistical support; JH, GJH, PEN, PLT, FS provided clinical advice; all authors contributed to interpretation of data, reviewing article drafts, and approving the final manuscript. TB is guarantor.

## References

1. Rothwell PM, Coull AJ, Silver LE, et al; Oxford Vascular Study. Population-based study of event-rate, incidence, case fatality, and mortality for all acute vascular events in all arterial territories. *Lancet*. 2005; 366:1773-1783.
2. Bhatt DL, Steg PG, Ohman M, et al; REACH Registry Investigators. International prevalence, recognition, and treatment of cardiovascular risk factors in outpatients with atherothrombosis. *JAMA*. 2006; 295:180-189.
3. Clark A, Preen DB, Ng JQ, et al. Is Western Australia representative of other Australian States and Territories in terms of key socio-demographic and health economic indicators? *Aust Health Rev*. 2010; 34:210-215.
4. Holman CDJ, Bass AJ, Rouse IL, et al. Population-based linkage of health records in Western Australia: development of a health services research linked database. *Aust N Z J Public Health*. 1999; 23:453-459.
5. World Health Organization. *International Classification of Diseases: the international statistical classification of diseases, injuries, and causes of death*. <http://www.who.int/classifications/icd/en/> (20 June 2013)
6. Nedkoff LJ, Briffa TG, Knuiman M, et al. Temporal trends in the incidence and recurrence of hospitalised atherothrombotic disease in an Australian population, 2000 - 2007. *Heart*. 2012;98:1449-1456.
7. Jamrozik K, Dobson A, Hobbs M, et al. Monitoring the incidence of cardiovascular disease in Australia. Report No. CVD Series 17. Canberra: AIHW; 2001.
8. Sanfilippo FM, Hobbs MST, Knuiman MW, et al. Can we monitor heart attack in the troponin era: evidence from a population-based cohort study. *BMC Cardiovasc Disord*. 2011; 11:35.

- 1  
2  
3  
4  
5  
6  
7 9. Mattes E, Norman PE, Jamrozik K. Falling incidence of amputations for peripheral  
8 occlusive arterial disease in Western Australia between 1980 and 1992. *Eur J Vasc*  
9 *Endovasc Surg.* 1997; 13:14-22.
- 10  
11 10. Norman PE, Semmens JB, Lawrence-Brown MMD, et al. Long term relative survival  
12 after surgery for population based study abdominal aortic aneurysm in Western  
13 Australia. *BMJ.* 1998; 317:852-856.
- 14  
15 11. SAS version 9.3 for Windows (Cary, North Carolina, USA).
- 16  
17 12. Goldstein LB. Accuracy of ICD-9-CM coding for the identification of patients with acute  
18 ischemic stroke: effect of modifier codes. *Stroke.* 1998; 29:1602-1604.
- 19  
20 13. Bhatt DL, Peterson ED, Harrington RA, et al. Prior polyvascular disease: risk factor for  
21 adverse ischaemic outcomes in acute coronary syndromes. *Eur Heart J.* 2009; 30:1195-  
22 1202.
- 23  
24 14. Schmidt M, Jacobsen JB, Lash TL, et al. 25 year trends in first time hospitalisation for  
25 acute myocardial infarction, subsequent short and long term mortality, and the prognostic  
26 impact of sex and comorbidity: a Danish nationwide cohort study. *BMJ.* 2012 Jan  
27 25;344:e356.
- 28  
29 15. Rothwell PM, Coull AJ, Silver LE, et al; Oxford Vascular Study. Change in stroke  
30 incidence, mortality, case-fatality, severity, and risk factors in Oxfordshire, UK from  
31 1981 to 2004 (Oxford Vascular Study). *Lancet.* 2004; 363:1925–1933.
- 32  
33 16. Van Kuijk J-P, Flu W-J, Welten GMJM, et al. Long-term prognosis of patients with  
34 peripheral arterial disease with or without polyvascular atherosclerotic disease. *Eur*  
35 *Heart J.* 2010; 31:992–999.
- 36  
37 17. Bairey Merz CN, Shaw LJ, Reis SE, et al; WISE Investigators. Insights from the  
38 NHLBI-Sponsored Women's Ischemia Syndrome Evaluation (WISE) Study: Part II:  
39 gender differences in presentation, diagnosis, and outcome with regard to gender-based  
40  
41  
42  
43  
44  
45  
46  
47  
48  
49  
50  
51  
52  
53  
54  
55  
56  
57  
58  
59  
60

- 1  
2  
3  
4  
5  
6  
7 pathophysiology of atherosclerosis and macrovascular and microvascular coronary  
8 disease. *J Am Coll Cardiol*. 2006;47:S21-29.  
9
- 10 18. MacIntyre K, Stewart S, Capewell S, et al. Gender and survival: a population-based study  
11 of 201,114 men and women following a first acute myocardial infarction. *J Am Coll*  
12 *Cardiol*. 2001;38:729-935.  
13  
14  
15
- 16 19. D'Ascenzo F, Gonella A, Quadri G, et al. Comparison of mortality rates in women versus  
17 men presenting with ST-segment elevation myocardial infarction. *Am J Cardiol*.  
18 2011;107:651-654.  
19  
20  
21
- 22 20. Roger VL, Jacobsen SJ, Weston SA, et al. Trends in the incidence and survival of  
23 patients with hospitalized myocardial infarction, Olmsted County, Minnesota, 1979 to  
24 1994. *Ann Intern Med*. 2002;136:341-348.  
25  
26  
27
- 28 21. Steg PG, Bhatt DL, Wilson PW, et al; REACH Registry Investigators. One-year  
29 cardiovascular event rates in outpatients with atherothrombosis. *JAMA*. 2007; 297:1197-  
30 1206.  
31  
32
- 33 22. Morrell J, Zeymer U, Baumgartner I, et al; REACH Registry Investigators. Differences  
34 in management and outcomes between male and female patients with atherothrombotic  
35 disease: results from the REACH Registry in Europe. *Eur J Cardiovasc Prev Rehabil*.  
36 2011; 18:270-277.  
37  
38  
39
- 40 23. Cimminiello C, Zaninelli A, Carolei A, et al. Atherothrombotic Burden and medium-  
41 term prognosis in patients with acute ischemic stroke: findings of the SIRIO Study.  
42 *Cerebrovasc Dis*. 2012; 33:341-347.  
43  
44  
45
- 46 24. Blanco M, Sobrino T, Montaner J, et al; MÍTICO Study. Stroke with polyvascular  
47 atherothrombotic disease. *Atherosclerosis*. 2010; 208: 587-592  
48  
49  
50  
51  
52  
53  
54  
55  
56  
57  
58  
59  
60

25. Feigin VL, Lawes CMM, Bennett DA, et al. Worldwide stroke incidence and early case fatality reported in 56 population-based studies: a systematic review. *Lancet Neurol.* 2009; 8:355–369.
26. Yusuf S, Hawken S, Ôunpuu S, et al; INTERHEART investigators. Effect of potentially modifiable risk factors associated with myocardial infarction in 52 countries: case-control study. *Lancet.* 2004; 364:937–952.
27. O’Donnell MJ, Xavier D, Liu L, et al; INTERSTROKE investigators. Risk factors for ischaemic and intracerebral haemorrhagic stroke in 22 countries:a case-control study. *Lancet.* 2010; 376:112-1 23.
28. Australian Institute of Health and Welfare 2011. *Cardiovascular disease: Australian facts 2011.* Cardiovascular disease series. Cat. no. CVD 53. Canberra: AIHW.
29. Ademi Z, Liew D, Chew D, et al; on behalf of the REACH registry investigators. Drug Treatment and Cost of Cardiovascular Disease in Australia. *Cardiovascular Therapeutics.* 2009; 27:164–172.
30. Heeley EL, Peiris DP, Patel AA, et al. Cardiovascular risk perception and evidence–practice gaps in Australian general practice (AusHEART Study). *Med J Aust.* 2010;192:254–259.

1  
2  
3  
4  
5  
6  
7  
8  
9  
10  
11  
12  
13  
14  
15  
16  
17  
18  
19  
20  
21  
22  
23  
24  
25  
26  
27  
28  
29  
30  
31  
32  
33  
34  
35  
36  
37  
38  
39  
40  
41  
42  
43  
44  
45  
46  
47  
48  
49  
50  
51  
52  
53  
54  
55  
56  
57  
58  
59  
60

20

Figure 1 A-F. Age-specific rates for hospitalised coronary, brain and periphery ischaemia by other vascular history (OVH; yes/no) in men (A,C,E) and in women (B,D,F), respectively.

For peer review only



STROBE Statement—Checklist of items that should be included in reports of *cross-sectional studies*

|                              | Item No | Recommendation                                                                                                                                                                                                                                                                                                                                                                                                |                     |
|------------------------------|---------|---------------------------------------------------------------------------------------------------------------------------------------------------------------------------------------------------------------------------------------------------------------------------------------------------------------------------------------------------------------------------------------------------------------|---------------------|
| <b>Title and abstract</b>    | 1       | (a) Indicate the study's design with a commonly used term in the title or the abstract<br>(b) Provide in the abstract an informative and balanced summary of what was done and what was found                                                                                                                                                                                                                 | p 1, 3<br>p 3       |
| <b>Introduction</b>          |         |                                                                                                                                                                                                                                                                                                                                                                                                               |                     |
| Background/rationale         | 2       | Explain the scientific background and rationale for the investigation being reported                                                                                                                                                                                                                                                                                                                          | p 5                 |
| Objectives                   | 3       | State specific objectives, including any prespecified hypotheses                                                                                                                                                                                                                                                                                                                                              | p 5                 |
| <b>Methods</b>               |         |                                                                                                                                                                                                                                                                                                                                                                                                               |                     |
| Study design                 | 4       | Present key elements of study design early in the paper                                                                                                                                                                                                                                                                                                                                                       | p 5.6               |
| Setting                      | 5       | Describe the setting, locations, and relevant dates, including periods of recruitment, exposure, follow-up, and data collection                                                                                                                                                                                                                                                                               | p 5.6               |
| Participants                 | 6       | (a) Give the eligibility criteria, and the sources and methods of selection of participants                                                                                                                                                                                                                                                                                                                   | p 5-7               |
| Variables                    | 7       | Clearly define all outcomes, exposures, predictors, potential confounders, and effect modifiers. Give diagnostic criteria, if applicable                                                                                                                                                                                                                                                                      | p 6.7               |
| Data sources/<br>measurement | 8*      | For each variable of interest, give sources of data and details of methods of assessment (measurement). Describe comparability of assessment methods if there is more than one group                                                                                                                                                                                                                          | p 6.7               |
| Bias                         | 9       | Describe any efforts to address potential sources of bias                                                                                                                                                                                                                                                                                                                                                     | p 6, 10, 1          |
| Study size                   | 10      | Explain how the study size was arrived at                                                                                                                                                                                                                                                                                                                                                                     | n/a                 |
| Quantitative variables       | 11      | Explain how quantitative variables were handled in the analyses. If applicable, describe which groupings were chosen and why                                                                                                                                                                                                                                                                                  | p 7.8               |
| Statistical methods          | 12      | (a) Describe all statistical methods, including those used to control for confounding<br>(b) Describe any methods used to examine subgroups and interactions<br>(c) Explain how missing data were addressed<br>(d) If applicable, describe analytical methods taking account of sampling strategy<br>(e) Describe any sensitivity analyses                                                                    | p 7.8<br>p 7        |
| <b>Results</b>               |         |                                                                                                                                                                                                                                                                                                                                                                                                               |                     |
| Participants                 | 13*     | (a) Report numbers of individuals at each stage of study—eg numbers potentially eligible, examined for eligibility, confirmed eligible, included in the study, completing follow-up, and analysed<br>(b) Give reasons for non-participation at each stage<br>(c) Consider use of a flow diagram                                                                                                               | p 8, Table 1<br>N/A |
| Descriptive data             | 14*     | (a) Give characteristics of study participants (eg demographic, clinical, social) and information on exposures and potential confounders<br>(b) Indicate number of participants with missing data for each variable of interest                                                                                                                                                                               | Table 1             |
| Outcome data                 | 15*     | Report numbers of outcome events or summary measures                                                                                                                                                                                                                                                                                                                                                          | Figure 1            |
| Main results                 | 16      | (a) Give unadjusted estimates and, if applicable, confounder-adjusted estimates and their precision (eg, 95% confidence interval). Make clear which confounders were adjusted for and why they were included<br>(b) Report category boundaries when continuous variables were categorized<br>(c) If relevant, consider translating estimates of relative risk into absolute risk for a meaningful time period | Table 2             |
| Other analyses               | 17      | Report other analyses done—eg analyses of subgroups and interactions, and sensitivity analyses                                                                                                                                                                                                                                                                                                                |                     |

1  
2  
3  
4  
5  
6  
7  
8  
9  
10  
11  
12  
13  
14  
15  
16  
17  
18  
19  
20  
21  
22  
23  
24  
25  
26  
27  
28  
29  
30  
31  
32  
33  
34  
35  
36  
37  
38  
39  
40  
41  
42  
43  
44  
45  
46  
47  
48  
49  
50  
51  
52  
53  
54  
55  
56  
57  
58  
59  
60

| <b>Discussion</b>        |    |                                                                                                                                                                            |
|--------------------------|----|----------------------------------------------------------------------------------------------------------------------------------------------------------------------------|
| Key results              | 18 | Summarise key results with reference to study objectives                                                                                                                   |
| Limitations              | 19 | Discuss limitations of the study, taking into account sources of potential bias or imprecision. Discuss both direction and magnitude of any potential bias                 |
| Interpretation           | 20 | Give a cautious overall interpretation of results considering objectives, limitations, multiplicity of analyses, results from similar studies, and other relevant evidence |
| Generalisability         | 21 | Discuss the generalisability (external validity) of the study results                                                                                                      |
| <b>Other information</b> |    |                                                                                                                                                                            |
| Funding                  | 22 | Give the source of funding and the role of the funders for the present study and, if applicable, for the original study on which the present article is based              |

p 9  
p 10,11  
p 11,12  
p 12  
p 15

\*Give information separately for exposed and unexposed groups.

**Note:** An Explanation and Elaboration article discusses each checklist item and gives methodological background and published examples of transparent reporting. The STROBE checklist is best used in conjunction with this article (freely available on the Web sites of PLoS Medicine at <http://www.plosmedicine.org/>, Annals of Internal Medicine at <http://www.annals.org/>, and Epidemiology at <http://www.epidem.com/>). Information on the STROBE Initiative is available at [www.strobe-statement.org](http://www.strobe-statement.org).

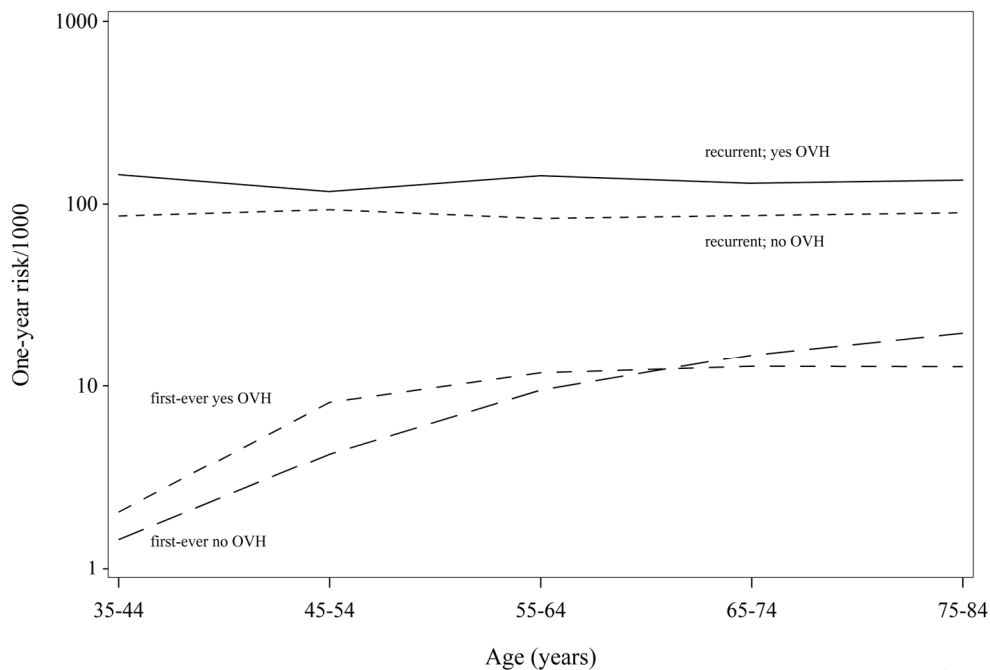

Age-specific rate for hospitalised coronary event by other vascular history (OVH; yes/no) in men  
160x119mm (300 x 300 DPI)

View only

1  
2  
3  
4  
5  
6  
7  
8  
9  
10  
11  
12  
13  
14  
15  
16  
17  
18  
19  
20  
21  
22  
23  
24  
25  
26  
27  
28  
29  
30  
31  
32  
33  
34  
35  
36  
37  
38  
39  
40  
41  
42  
43  
44  
45  
46  
47  
48  
49  
50  
51  
52  
53  
54  
55  
56  
57  
58  
59  
60

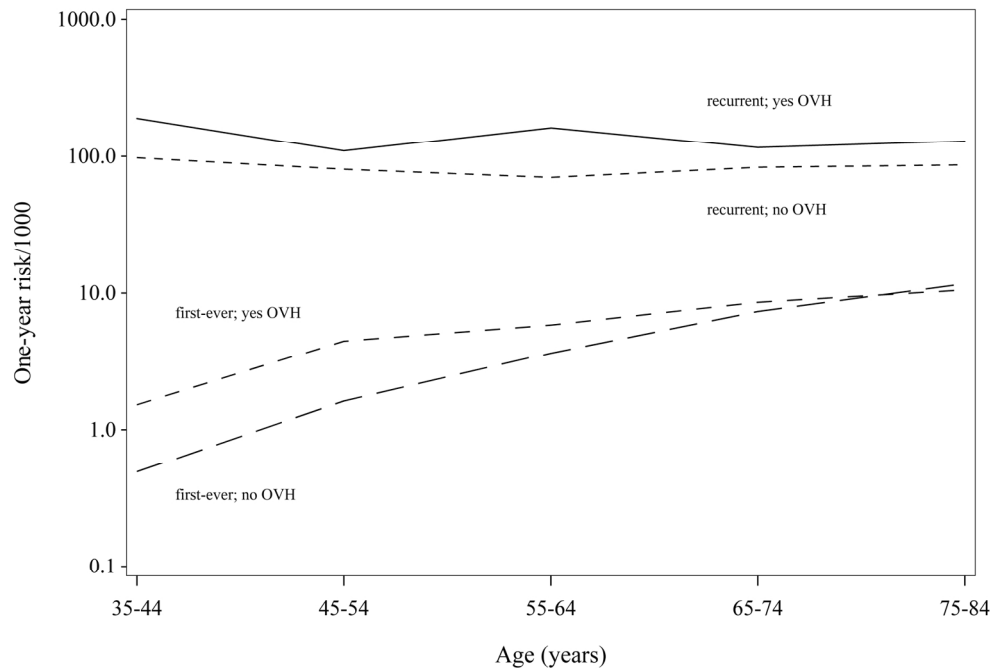

Age-specific rate for hospitalised coronary event by other vascular history (OVH; yes/no) in women  
160x119mm (300 x 300 DPI)

ew only

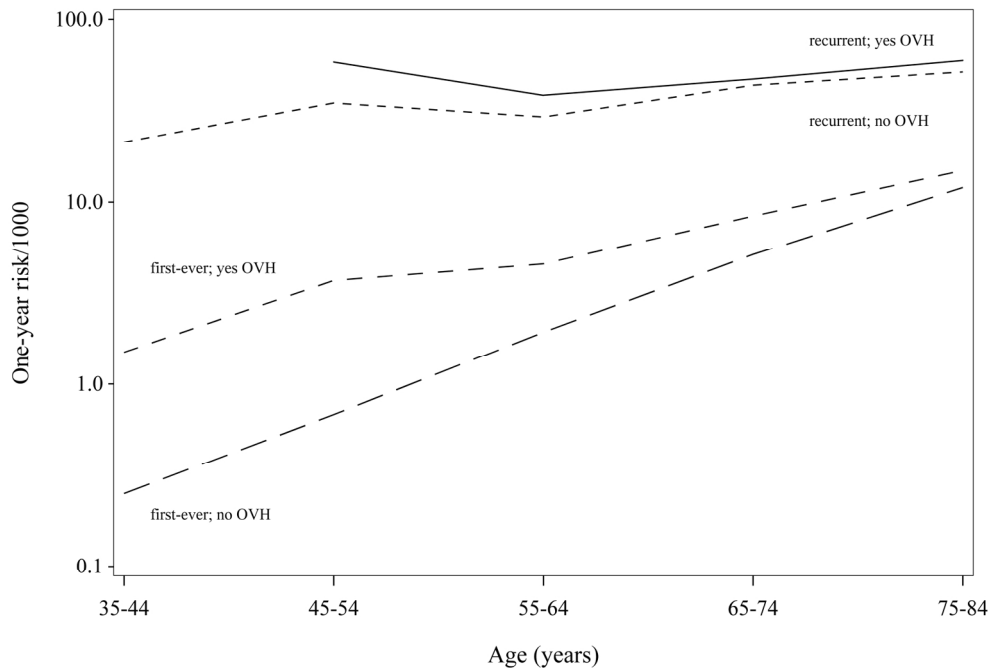

Age-specific rate for hospitalised brain event by other vascular history (OVH; yes/no) in men  
160x119mm (300 x 300 DPI)

Review only

1  
2  
3  
4  
5  
6  
7  
8  
9  
10  
11  
12  
13  
14  
15  
16  
17  
18  
19  
20  
21  
22  
23  
24  
25  
26  
27  
28  
29  
30  
31  
32  
33  
34  
35  
36  
37  
38  
39  
40  
41  
42  
43  
44  
45  
46  
47  
48  
49  
50  
51  
52  
53  
54  
55  
56  
57  
58  
59  
60

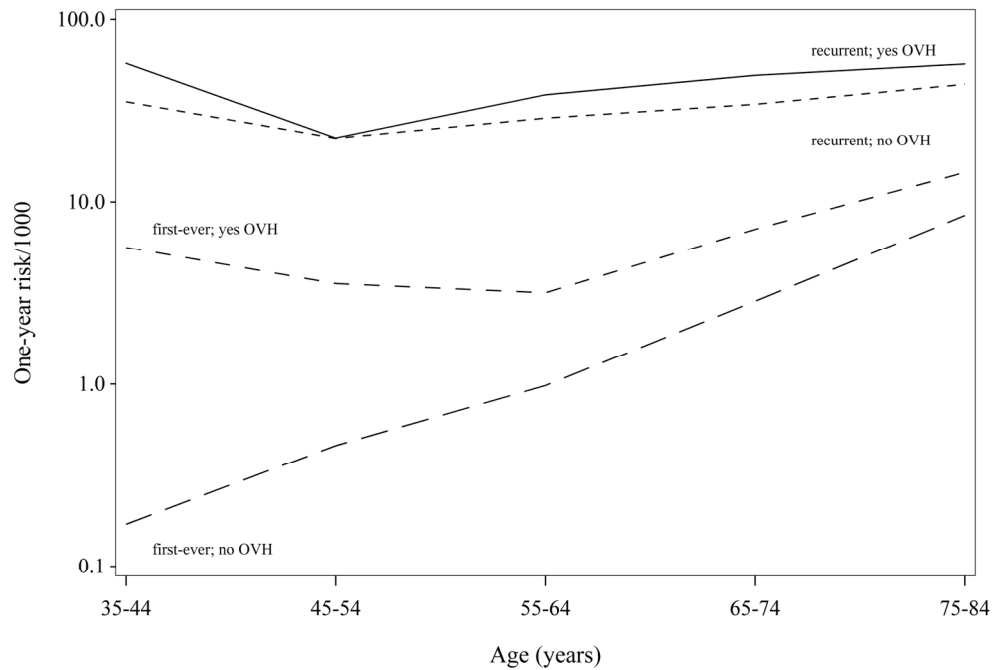

Age-specific rate for hospitalised brain event by other vascular history (OVH; yes/no) in women  
160x119mm (300 x 300 DPI)

Review only

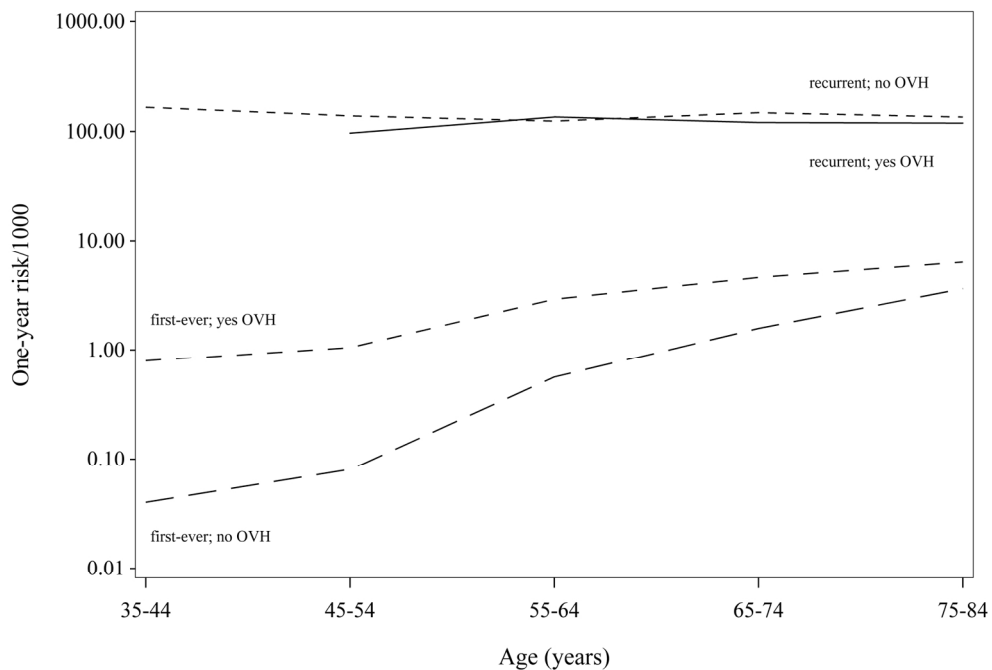

Age-specific rate for hospitalised periphery event by other vascular history (OVH; yes/no) in men  
160x119mm (300 x 300 DPI)

View only

1  
2  
3  
4  
5  
6  
7  
8  
9  
10  
11  
12  
13  
14  
15  
16  
17  
18  
19  
20  
21  
22  
23  
24  
25  
26  
27  
28  
29  
30  
31  
32  
33  
34  
35  
36  
37  
38  
39  
40  
41  
42  
43  
44  
45  
46  
47  
48  
49  
50  
51  
52  
53  
54  
55  
56  
57  
58  
59  
60

1  
2  
3  
4  
5  
6  
7  
8  
9  
10  
11  
12  
13  
14  
15  
16  
17  
18  
19  
20  
21  
22  
23  
24  
25  
26  
27  
28  
29  
30  
31  
32  
33  
34  
35  
36  
37  
38  
39  
40  
41  
42  
43  
44  
45  
46  
47  
48  
49  
50  
51  
52  
53  
54  
55  
56  
57  
58  
59  
60

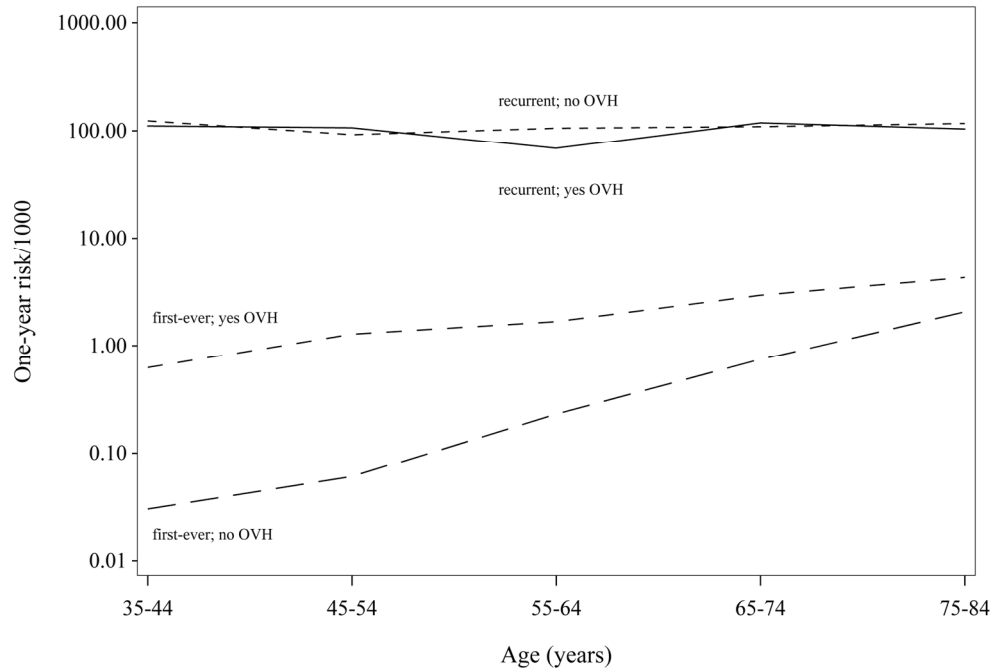

Age-specific rate for hospitalised periphery event by other vascular history (OVH; yes/no) in women  
160x119mm (300 x 300 DPI)

Review only
